# Supplementary material for: Highly red-emissive salen–indium complexes: impact of 4-amino-substitution on the photophysical properties
Source: Royal Society of Chemistry journal article supplement (doi:10.1039/d1qi01337h), 2021-11-08
Supplement: d1qi01337h1.pdf [file d1qi01337h1.pdf]

## Electronic Supplementary Information

### Highly red-emissive salen–indium complexes: Impact of 4-amino-substitution on the photophysical properties

Sang Woo Kwak,<sup>[a]†</sup> Hanif Mubarak,<sup>[b]†</sup> Ji Hye Lee,<sup>[c]</sup> Hyonseok Hwang,<sup>[c]</sup> Kang Mun Lee,<sup>[c]</sup> Min Hyung Lee,<sup>\*[b]</sup> and Myung Hwan Park<sup>\*[a]</sup>

<sup>[a]</sup> Department of Chemistry Education Cheongju, Chungbuk 28644, Republic of Korea

<sup>[b]</sup> Department of Chemistry, University of Ulsan, Ulsan 44610, Republic of Korea

<sup>[c]</sup> Department of Chemistry, Institute for Molecular Science and Fusion Technology, Kangwon National University, Chuncheon, Gangwon 24341, Republic of Korea

### Contents

|                                                                                  |         |
|----------------------------------------------------------------------------------|---------|
| X-ray crystallography and Cyclic voltammetry .....                               | S2      |
| <sup>1</sup> H and <sup>13</sup> C NMR Spectra of <b>1–4</b> .....               | S3–S6   |
| Crystallographic data and parameters of <b>2</b> .....                           | S7–S8   |
| Cyclic voltammograms of <b>1–3</b> .....                                         | S9      |
| UV-vis absorption and PL spectra of <b>1–3</b> in various organic solvents ..... | S9      |
| Emission decay curves of <b>1–3</b> .....                                        | S10     |
| PL spectra of <b>1–3</b> in film state .....                                     | S10     |
| Computational results of <b>1–4</b> .....                                        | S11–S29 |

## Experimental Section

### X-ray crystallography

Single crystals suitable for X-ray diffraction study were grown from diethyl ether/EtOH solution of **2**. Single crystal of **2** was coated with Paratone oil and mounted onto a glass capillary. The crystallographic measurements were performed on a Bruker APEX II CCD detector diffractometer with a graphite-monochromated Mo-K $\alpha$  radiation ( $\lambda = 0.71073 \text{ \AA}$ ). The structure was solved by direct methods and all non-hydrogen atoms were subjected to anisotropic refinement by a full-matrix least-squares method on  $F^2$  by using the SHELXTL/PC package, resulting in X-ray crystallographic data of **2** in CIF format (CCDC 2091666). Hydrogen atoms were placed at their geometrically calculated positions and refined riding on the corresponding carbon atoms with isotropic thermal parameters. The detailed crystallographic data are given in Table S1 and S2.

### Cyclic Voltammetry

Cyclic voltammetry measurements were carried out in MeCN (1 mM) with a three-electrode cell configuration consisting of platinum working and counter electrodes and an Ag/AgNO<sub>3</sub> (0.01 M in MeCN) reference electrode at room temperature. The redox potentials were recorded at a scan rate of 100 mV/s and are reported with reference to the ferrocene/ferrocenium (Fc/Fc<sup>+</sup>) redox couple.

# $^1\text{H}$ and $^{13}\text{C}$ NMR Spectra

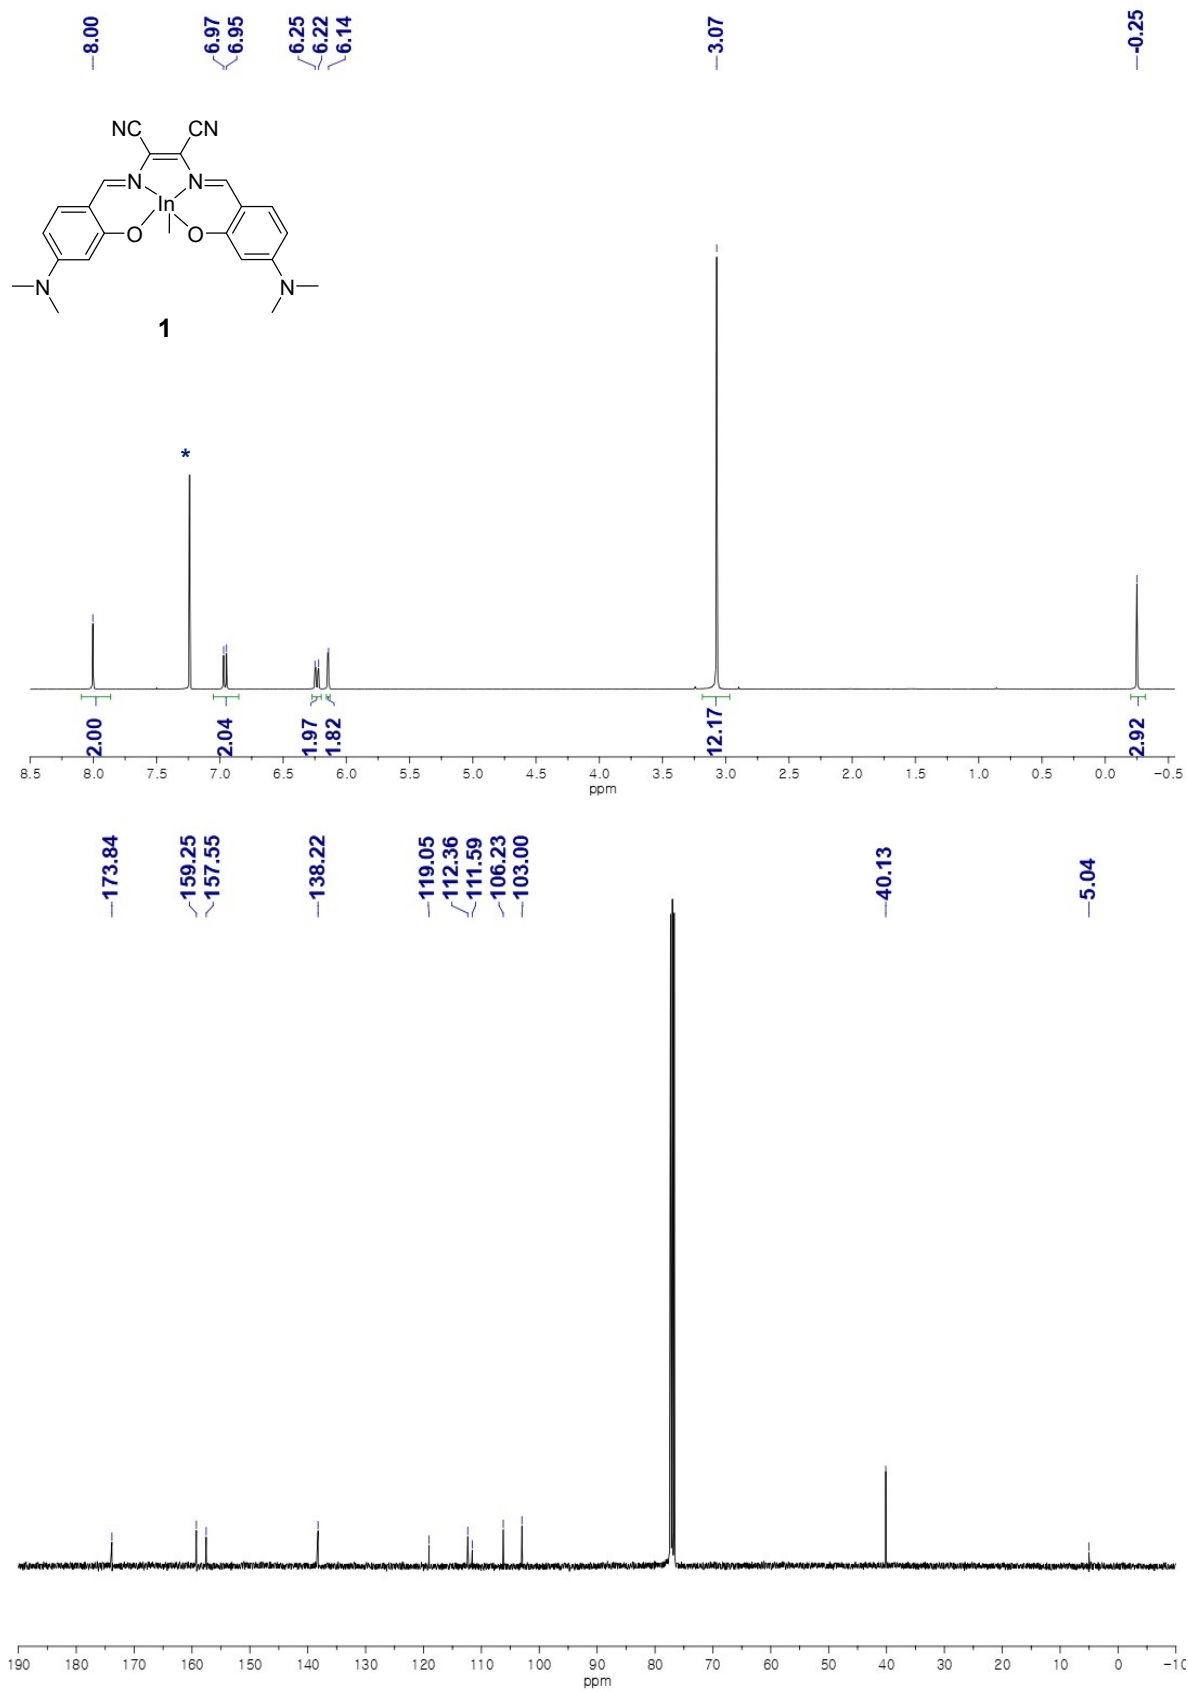

**Fig. S1**  $^1\text{H}$  (top) and  $^{13}\text{C}$  (bottom) NMR spectra of **1** (\*from residual  $\text{CHCl}_3$  in  $\text{CDCl}_3$ ).

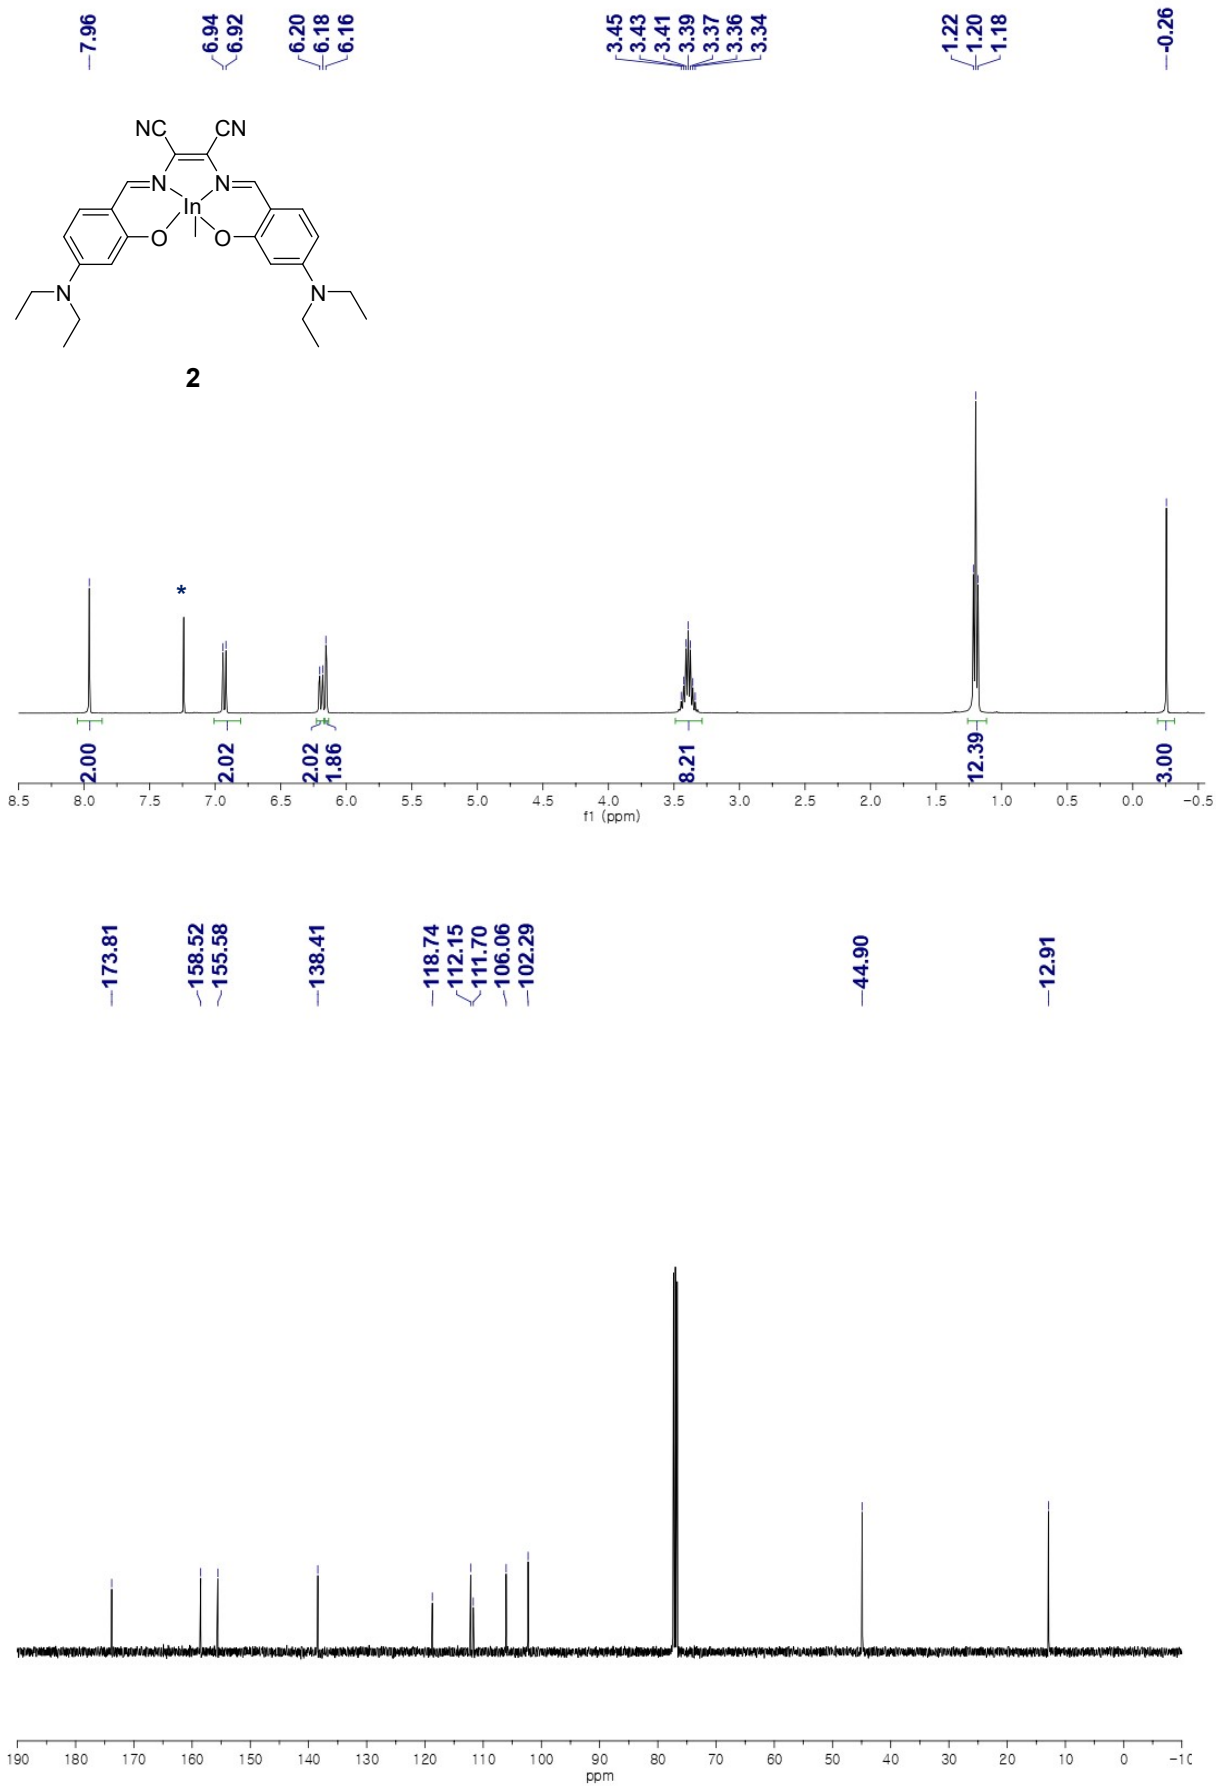

**Fig. S2** <sup>1</sup>H (top) and <sup>13</sup>C (bottom) NMR spectra of **2** (\*from residual CHCl<sub>3</sub> in CDCl<sub>3</sub>).

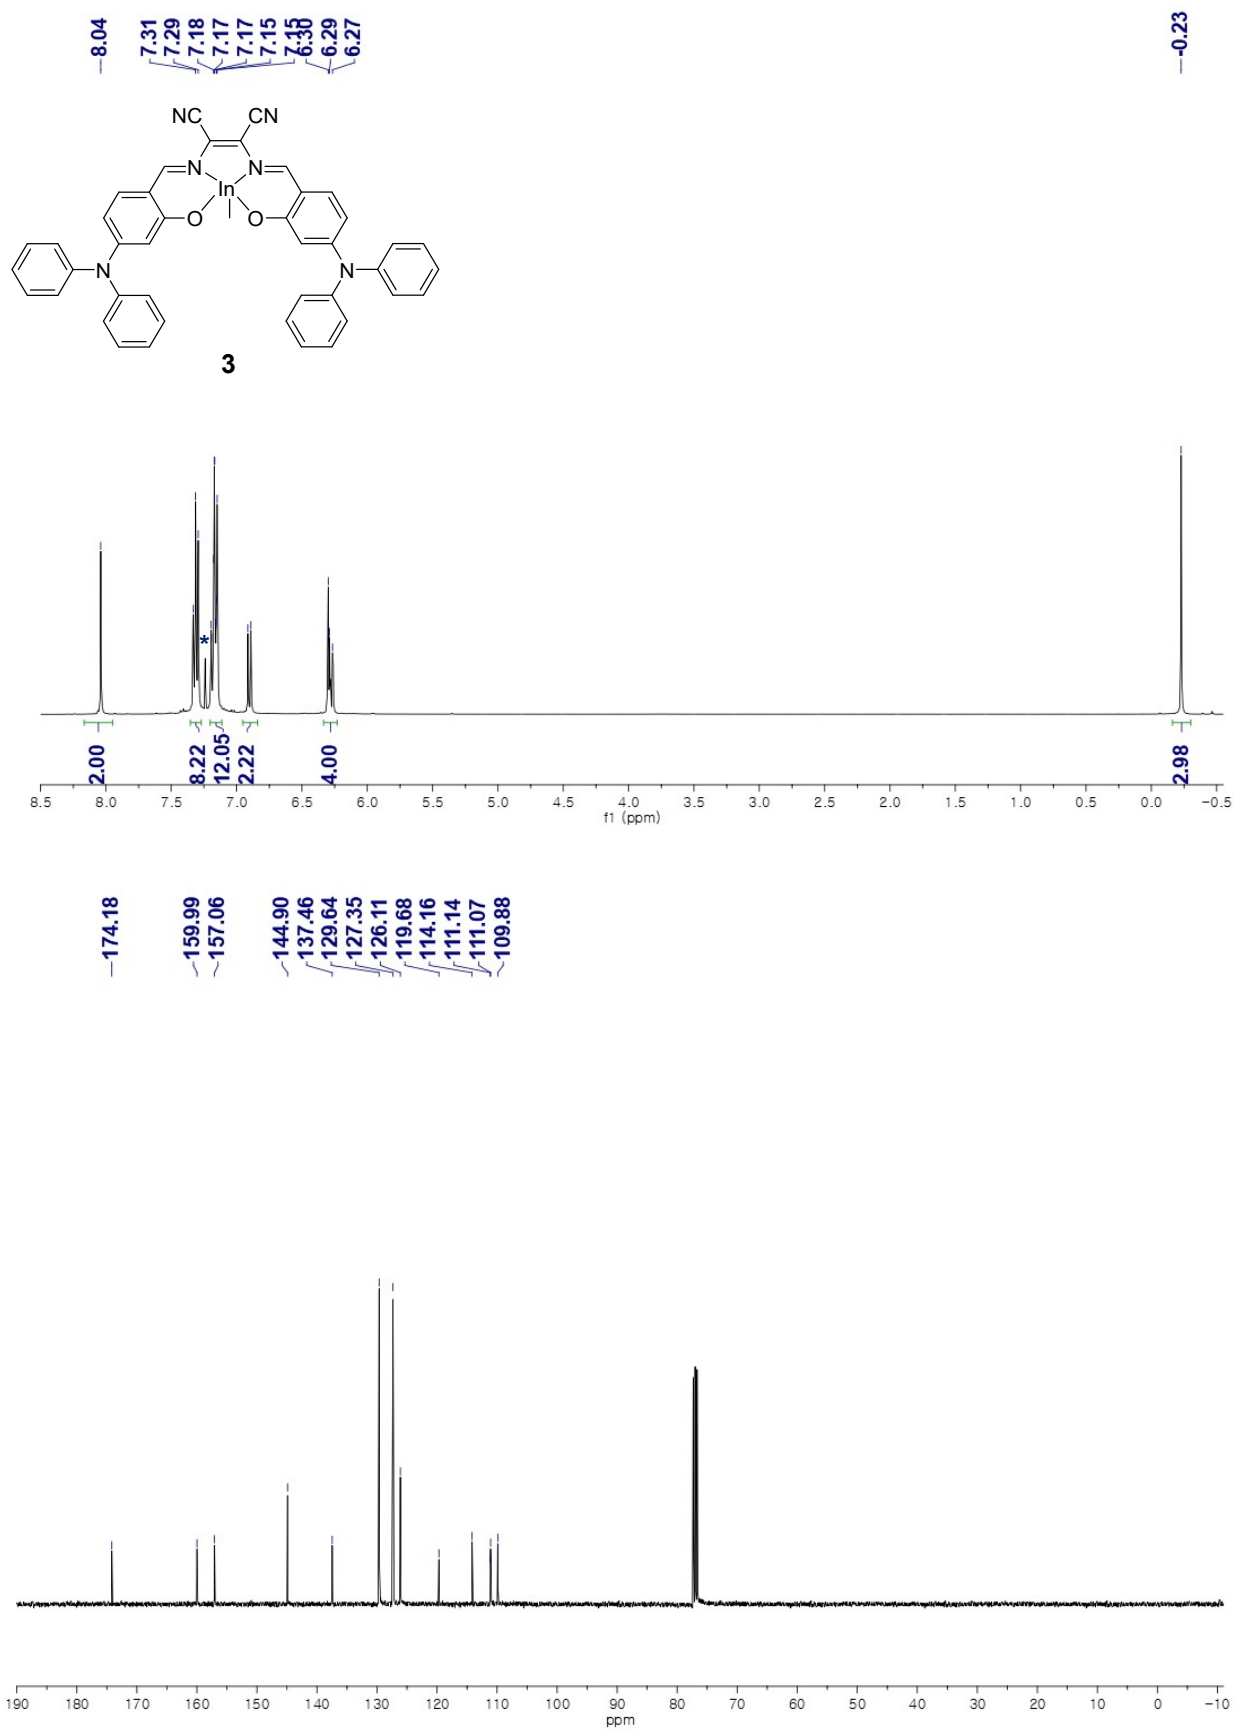

**Fig. S3** <sup>1</sup>H (top) and <sup>13</sup>C (bottom) NMR spectra of **3** (\* from residual CHCl<sub>3</sub> in CDCl<sub>3</sub>).

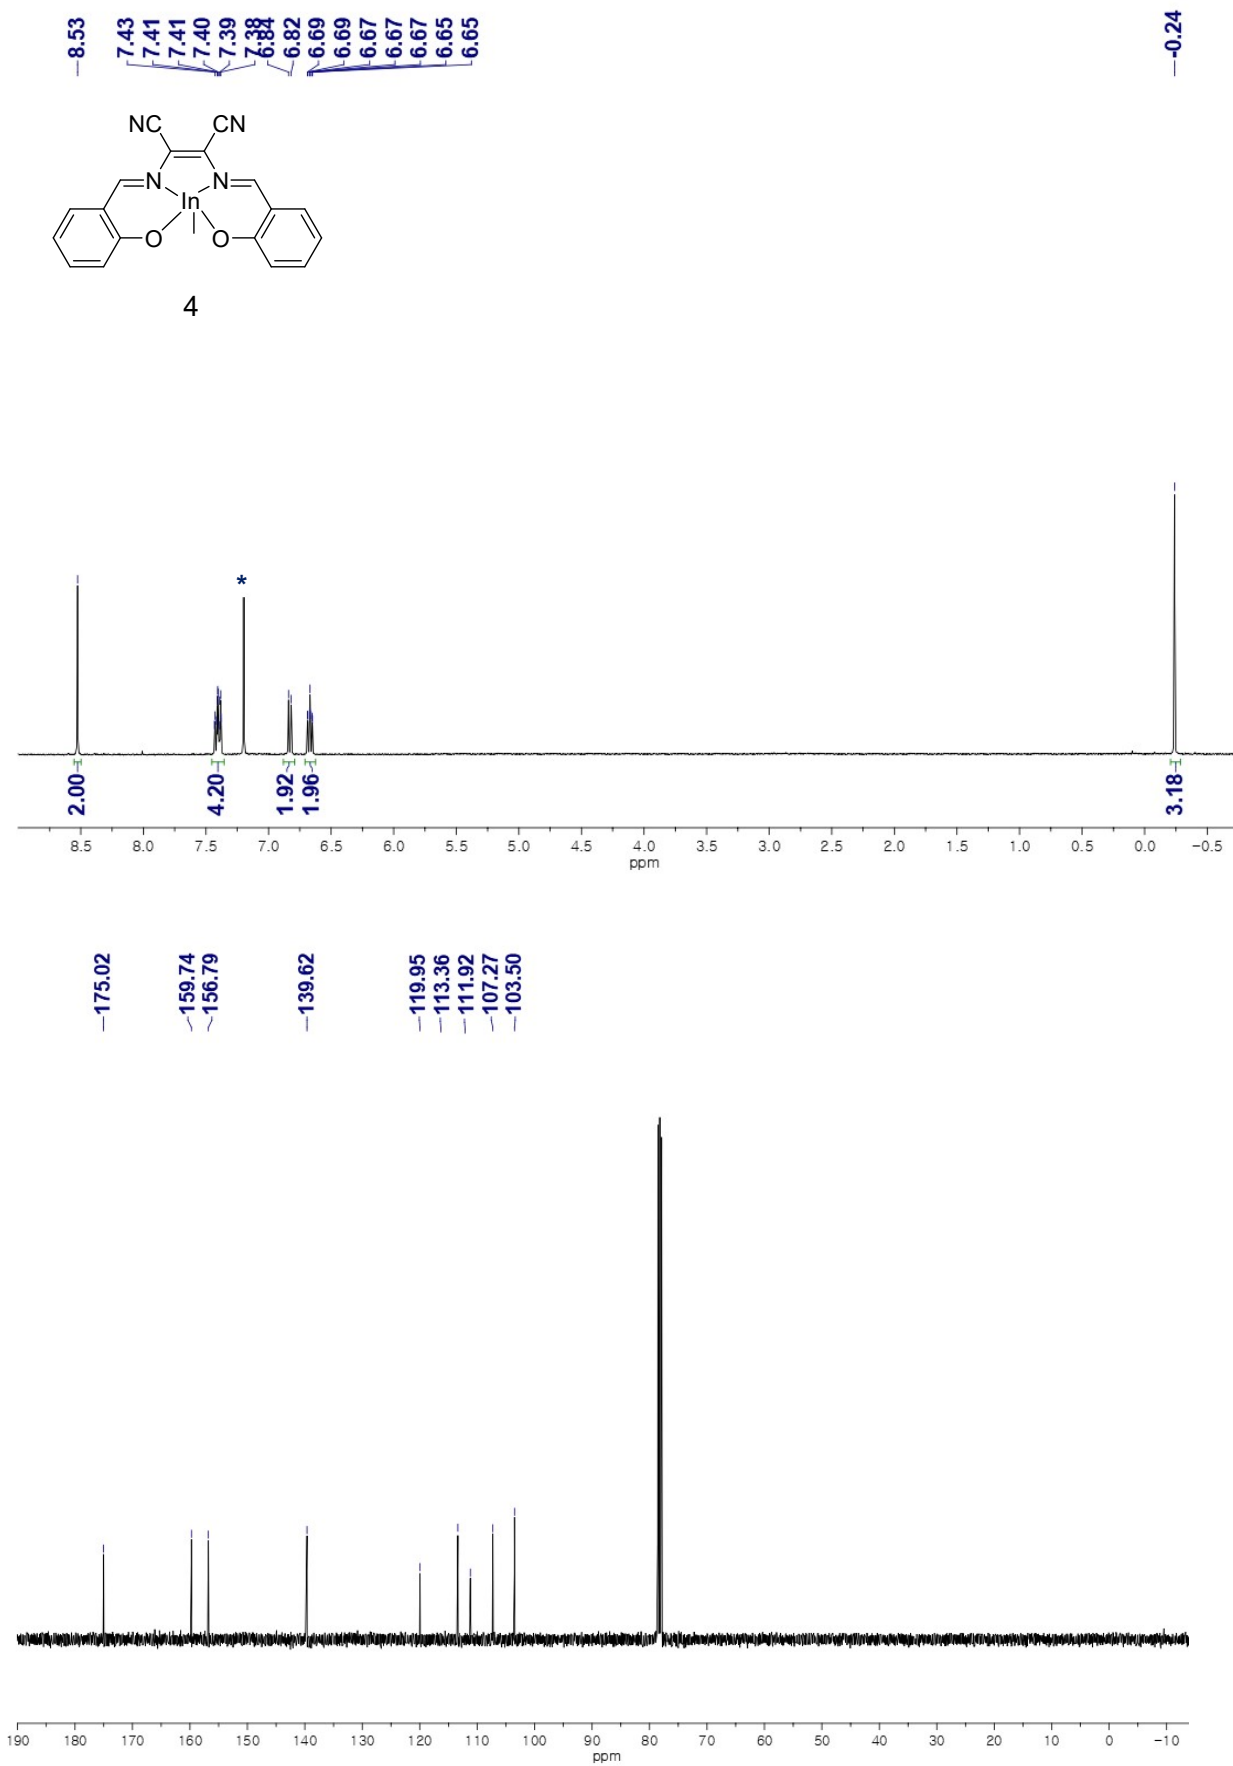

**Fig. S4** <sup>1</sup>H (top) and <sup>13</sup>C (bottom) NMR spectra of **4** (\* from residual CHCl<sub>3</sub> in CDCl<sub>3</sub>).

**Table S1** Crystallographic data and parameters for **2**

| Compound                                                               | <b>2</b>                                                        |
|------------------------------------------------------------------------|-----------------------------------------------------------------|
| Formula                                                                | C <sub>27</sub> H <sub>31</sub> InN <sub>6</sub> O <sub>2</sub> |
| Formula weight                                                         | 586.40                                                          |
| Crystal system                                                         | Monoclinic                                                      |
| Space group                                                            | P21/n                                                           |
| <i>a</i> (Å)                                                           | 10.744(2)                                                       |
| <i>b</i> (Å)                                                           | 20.929(4)                                                       |
| <i>c</i> (Å)                                                           | 12.803(2)                                                       |
| <i>α</i> (°)                                                           | 90                                                              |
| <i>β</i> (°)                                                           | 90.00(3)                                                        |
| <i>γ</i> (°)                                                           | 90                                                              |
| <i>V</i> (Å <sup>3</sup> )                                             | 2878.9(10)                                                      |
| <i>Z</i>                                                               | 4                                                               |
| $\rho_{\text{calc}}$ (g cm <sup>-3</sup> )                             | 1.353                                                           |
| $\mu$ (mm <sup>-1</sup> )                                              | 0.853                                                           |
| <i>F</i> (000)                                                         | 1200                                                            |
| <i>T</i> (K)                                                           | 293(2)                                                          |
| Scan mode                                                              | <i>multi-scan</i>                                               |
| <i>hkl</i> range                                                       | -13 < <i>h</i> < 13, -26 < <i>k</i> < 26, -16 < <i>l</i> < 13   |
| Measurement reflns                                                     | 27424                                                           |
| Unique reflns [ <i>R</i> <sub>int</sub> ]                              | 6409 [0.0544]                                                   |
| Reflns used for refinement                                             | 6409                                                            |
| Refined parameters                                                     | 330                                                             |
| <i>R</i> <sub>1</sub> <sup><i>a</i></sup> ( <i>I</i> > 2σ( <i>I</i> )) | 0.0487                                                          |
| <i>wR</i> <sub>2</sub> <sup><i>b</i></sup> all data                    | 0.1557                                                          |
| GOF on <i>F</i> <sup>2</sup>                                           | 1.000                                                           |
| $\rho_{\text{fin}}$ (max/min) (e Å <sup>-3</sup> )                     | 0.520, -0.730                                                   |

$$^a \quad R_1 = \frac{\sum ||F_o| - |F_c||}{\sum |F_o|} \quad ^b \quad wR_2 = \left\{ \frac{\sum w(F_o^2 - F_c^2)^2}{\sum w(F_o^2)^2} \right\}^{1/2}.$$

**Table S2** Selected bond lengths (Å) and angles (°) for **2**

| Compound | <b>2</b>   |
|----------|------------|
|          | lengths    |
| In-O1    | 2.145(3)   |
| In-O2    | 2.131(3)   |
| In-N1    | 2.297(3)   |
| In-N2    | 2.282(3)   |
| In-C1    | 2.174(7)   |
|          | Angles     |
| O1-In-O2 | 91.66(10)  |
| O1-In-N1 | 81.15(11)  |
| O1-In-N2 | 134.29(13) |
| O2-In-N1 | 134.61(12) |
| O2-In-N2 | 81.91(11)  |
| O1-In-C1 | 115.50(2)  |
| O2-In-C1 | 112.34(19) |
| N1-In-N2 | 72.43(11)  |
| N1-In-C1 | 111.10(2)  |
| N2-In-C1 | 108.60(2)  |



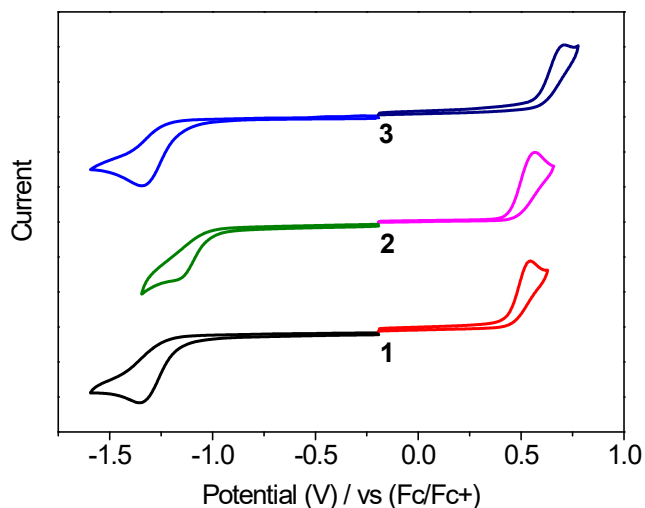

**Fig. S5** Cyclic voltammograms (CV) for **1–3** (1 mM in MeCN, scan rate = 100 mV/s).

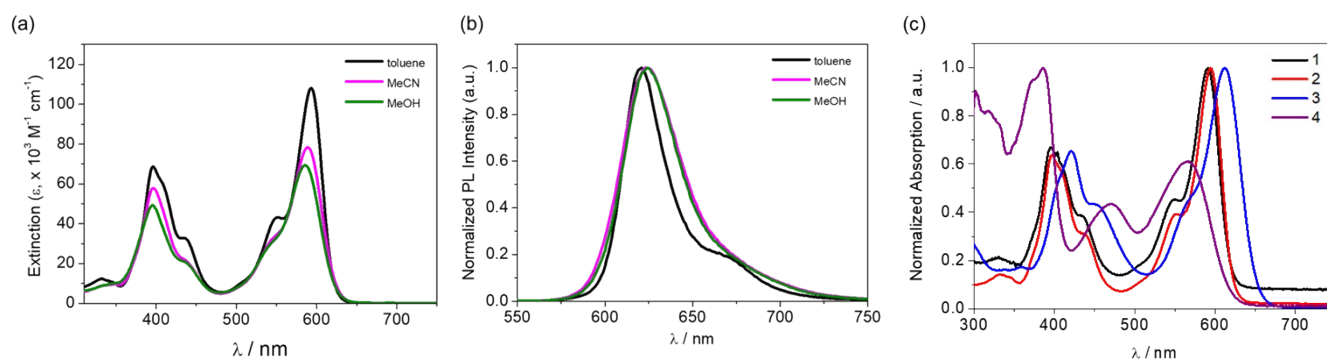

**Fig. S6** (a) UV–vis absorption and (b) PL spectra of **2** in various organic solvents (20  $\mu$ M) at 298 K. (c) Normalized absorption spectra of **1–4** in toluene at 298 K.

**Table S3** UV–vis absorption and PL spectra of **2** in various organic solvents (20  $\mu$ M) at 298 K

| Solvent | $\lambda_{\text{abs}} / \text{nm}$ ( $\epsilon$ )     | $\lambda_{\text{ex}} / \text{nm}$ | $\lambda_{\text{em}} / \text{nm}$ | $\Phi_{\text{PL}} / \%$ |
|---------|-------------------------------------------------------|-----------------------------------|-----------------------------------|-------------------------|
| toluene | 397 (47.46), 437 (23.14),<br>551 (29.19), 594 (74.65) | 400                               | 617                               | 74.3                    |
| DCM     | 397 (50.95), 597 (73.15)                              | 398                               | 629                               | 54.4                    |
| acetone | 396 (58.17), 592 (81.84)                              | 397                               | 620                               | 52.0                    |
| MeCN    | 396 (58.17), 589 (78.34)                              | 396                               | 624                               | 67.5                    |
| MeOH    | 395 (49.22), 586 (69.33)                              | 392                               | 624                               | 43.8                    |

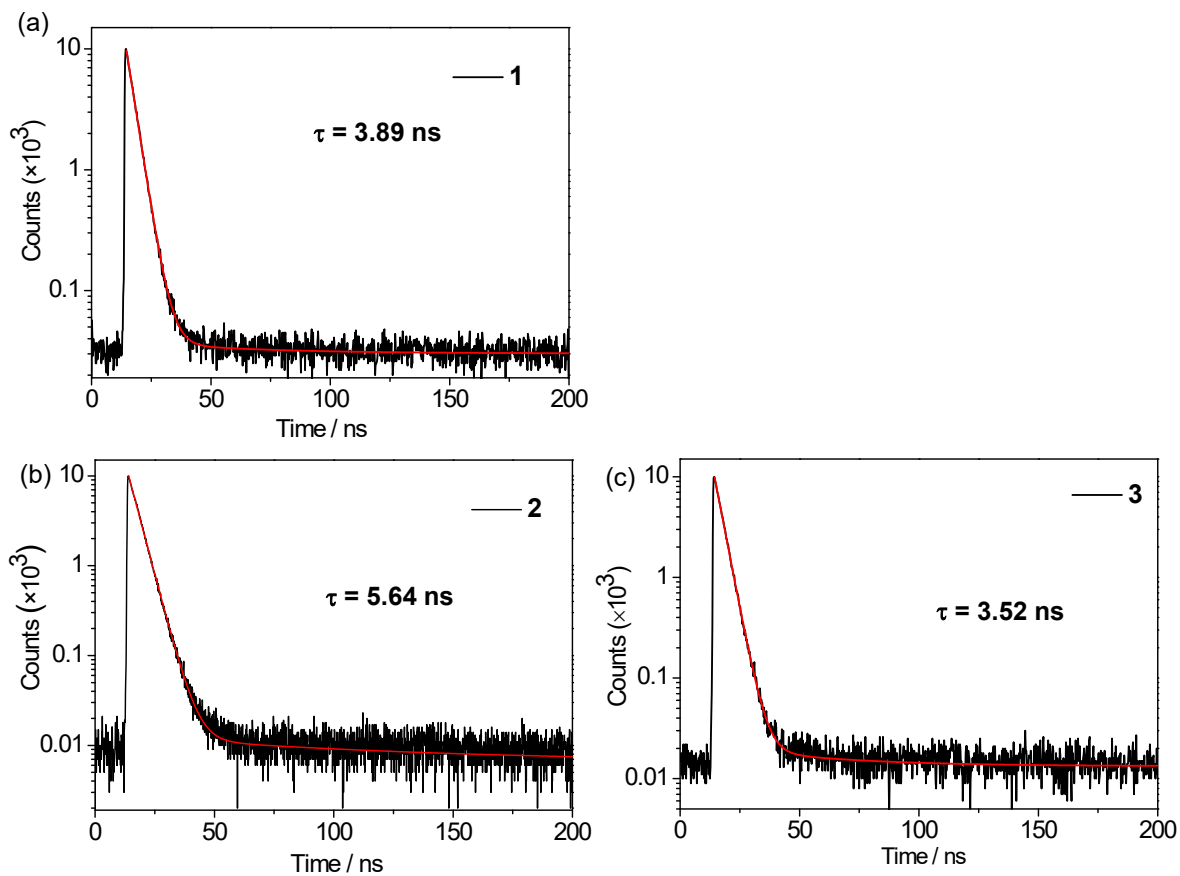

**Fig. S7** Emission decay curves of toluene (20  $\mu\text{M}$ ) solutions of (a) **1**, (b) **2**, and (c) **3** at 298 K (black line). The red-line corresponds to the single-exponential fitting curves.

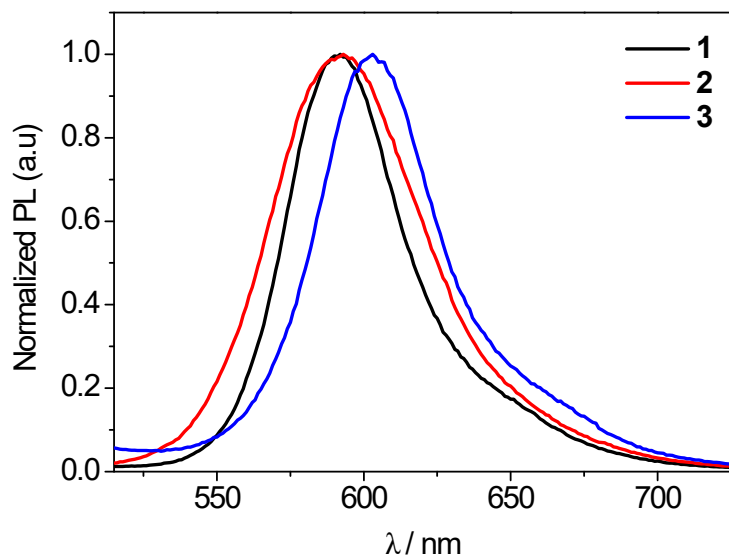

**Fig. S8** PL spectra of **1–3** in film state (1 wt% doped on PMMA) at 298 K.

## Computational Results

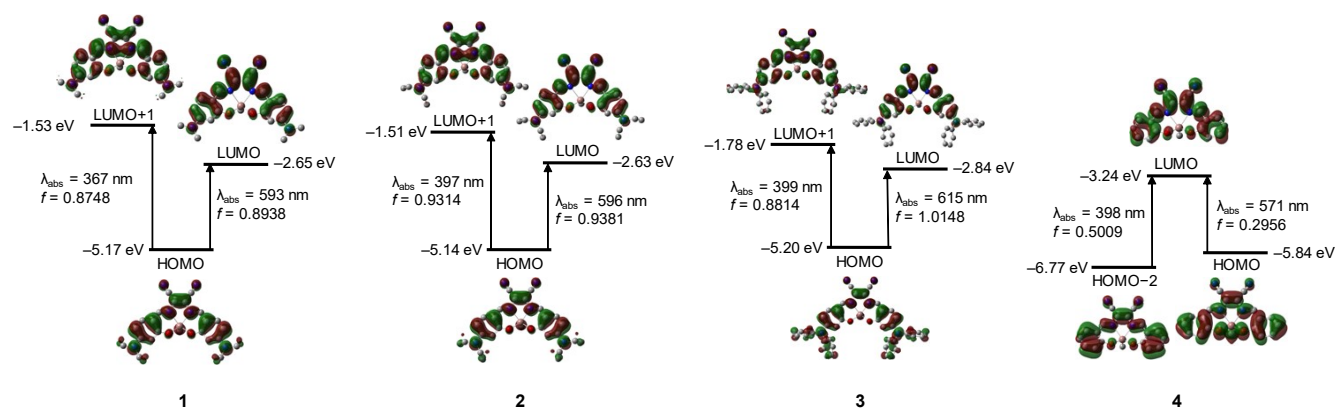

**Fig. S9** Frontier molecular orbitals for **1–4** at their ground state ( $S_0$ ) with their relative energies from DFT calculation (isovalue 0.04). The transition energy (in nm) was calculated using the TD-B3LYP method with 6-31G(d, p) basis sets.

**Table S4** The major electronic transition for **1–4** at ground state ( $S_0$ ) calculated using the TD-B3LYP method with 6-31G(d, p) basis sets<sup>[a]</sup>

|          | $\lambda_{\text{calc}}/ \text{nm}$ | $f_{\text{calc}}$ | Assignment                        |
|----------|------------------------------------|-------------------|-----------------------------------|
| <b>1</b> | 593.15                             | 0.8938            | HOMO $\rightarrow$ LUMO (98.3%)   |
|          | 366.61                             | 0.8748            | HOMO $\rightarrow$ LUMO+1 (75.5%) |
| <b>2</b> | 595.91                             | 0.9381            | HOMO $\rightarrow$ LUMO (98.5%)   |
|          | 397.38                             | 0.9314            | HOMO $\rightarrow$ LUMO+1 (75.7%) |
| <b>3</b> | 614.83                             | 1.0148            | HOMO $\rightarrow$ LUMO (98.9%)   |
|          | 398.95                             | 0.8814            | HOMO $\rightarrow$ LUMO+1 (87.8%) |
| <b>4</b> | 570.52                             | 0.2956            | HOMO $\rightarrow$ LUMO (98.6%)   |
|          | 397.93                             | 0.5009            | HOMO-2 $\rightarrow$ LUMO (96.0%) |

<sup>[a]</sup> Singlet energies for the vertical transition calculated at the optimized  $S_0$  geometries.

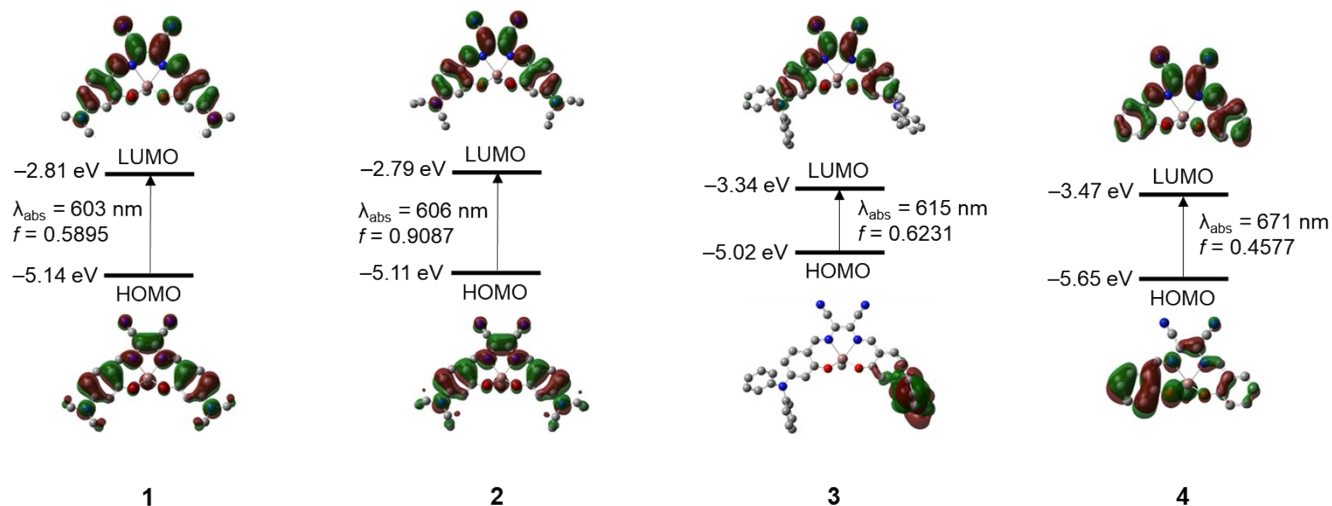

**Fig. S10** Frontier molecular orbitals for **1–4** at their first singlet excited state ( $S_1$ ) with their relative energies from DFT calculation (isovalue 0.04). The transition energy (in nm) was calculated using the TD-B3LYP method with 6-31G(d, p) basis sets.

**Table S5** The major electronic transition for **1–4** at first singlet excited state ( $S_1$ ) calculated using the TD-B3LYP method with 6-31G(d, p) basis sets<sup>[a]</sup>

|          | $\lambda_{\text{calc}}/\text{nm}$ | $f_{\text{calc}}$ | Assignment                      |
|----------|-----------------------------------|-------------------|---------------------------------|
| <b>1</b> | 603.30                            | 0.8595            | HOMO $\rightarrow$ LUMO (98.0%) |
| <b>2</b> | 605.58                            | 0.9087            | HOMO $\rightarrow$ LUMO (98.4%) |
| <b>3</b> | 615.42                            | 0.6231            | HOMO $\rightarrow$ LUMO (99.1%) |
| <b>4</b> | 670.58                            | 0.4577            | HOMO $\rightarrow$ LUMO (99.4%) |

<sup>[a]</sup> Singlet energies for the vertical transition calculated at the optimized  $S_0$  geometries.

**Table S6** Computed absorption wavelengths ( $\lambda_{\text{calc}}$  in nm) and oscillator strengths ( $f_{\text{calc}}$ ) for **1** from TD-B3LYP calculations using the B3LYP geometries at the ground state ( $S_0$ ) and first singlet excited state ( $S_1$ ) optimized geometries in toluene

| state | $\lambda_{\text{calc}}$ (nm) | $f_{\text{calc}}$ | major contribution |   |                |
|-------|------------------------------|-------------------|--------------------|---|----------------|
| $S_0$ |                              |                   |                    |   |                |
| 1     | 593.15                       | 0.8938            | HOMO               | → | LUMO (98.3%)   |
| 2     | 466.12                       | 0.0930            | HOMO-2             | → | LUMO (97.8%)   |
| 3     | 462.66                       | 0.0110            | HOMO-1             | → | LUMO (76.5%)   |
| 4     | 430.93                       | 0.1196            | HOMO-3             | → | LUMO (65.1%)   |
| 5     | 366.61                       | 0.8748            | HOMO               | → | LUMO+1 (75.5%) |
| $S_1$ |                              |                   |                    |   |                |
| 1     | 603.30                       | 0.8595            | HOMO               | → | LUMO (98.0%)   |
| 2     | 493.93                       | 0.1225            | HOMO-2             | → | LUMO (97.5%)   |
| 3     | 488.74                       | 0.0050            | HOMO-1             | → | LUMO (75.0%)   |
| 4     | 449.54                       | 0.1515            | HOMO-3             | → | LUMO (64.2%)   |
| 5     | 373.69                       | 0.1389            | HOMO               | → | LUMO+1 (77.9%) |

**Table S7** Molecular orbital energies (in eV) and molecular orbital distributions (in %) of **1** at the ground state ( $S_0$ ) and first singlet excited state ( $S_1$ ) optimized geometries in toluene

|        | E (eV) | EtCN <sub>2</sub> imine | In-Me | Substituent | Phenoxy |
|--------|--------|-------------------------|-------|-------------|---------|
| $S_0$  |        |                         |       |             |         |
| LUMO+3 | -0.20  | 94.4                    | 3.4   | 0.0         | 2.2     |
| LUMO+2 | -0.84  | 61.0                    | 0.1   | 3.8         | 35.1    |
| LUMO+1 | -1.53  | 28.0                    | 1.3   | 6.6         | 64.1    |
| LUMO   | -2.65  | 45.3                    | 0.2   | 5.7         | 48.8    |
| HOMO   | -5.17  | 31.4                    | 2.6   | 19.5        | 46.5    |
| HOMO-1 | -5.76  | 3.8                     | 0.1   | 39.3        | 56.7    |
| HOMO-2 | -5.80  | 0.6                     | 5.7   | 17.1        | 76.6    |
| HOMO-3 | -5.93  | 10.6                    | 0.2   | 4.7         | 84.5    |
| $S_1$  |        |                         |       |             |         |
| LUMO+3 | -0.18  | 94.3                    | 3.5   | 0.0         | 2.3     |
| LUMO+2 | -0.90  | 59.8                    | 0.1   | 3.8         | 36.3    |
| LUMO+1 | -1.55  | 29.6                    | 1.3   | 6.3         | 62.8    |
| LUMO   | -2.81  | 45.9                    | 0.2   | 5.7         | 48.2    |
| HOMO   | -5.14  | 31.4                    | 2.9   | 18.6        | 47.1    |
| HOMO-1 | -5.79  | 3.0                     | 0.2   | 38.3        | 58.5    |
| HOMO-2 | -5.80  | 0.5                     | 6.5   | 18.3        | 74.7    |
| HOMO-3 | -5.93  | 10.9                    | 0.2   | 6.6         | 82.3    |

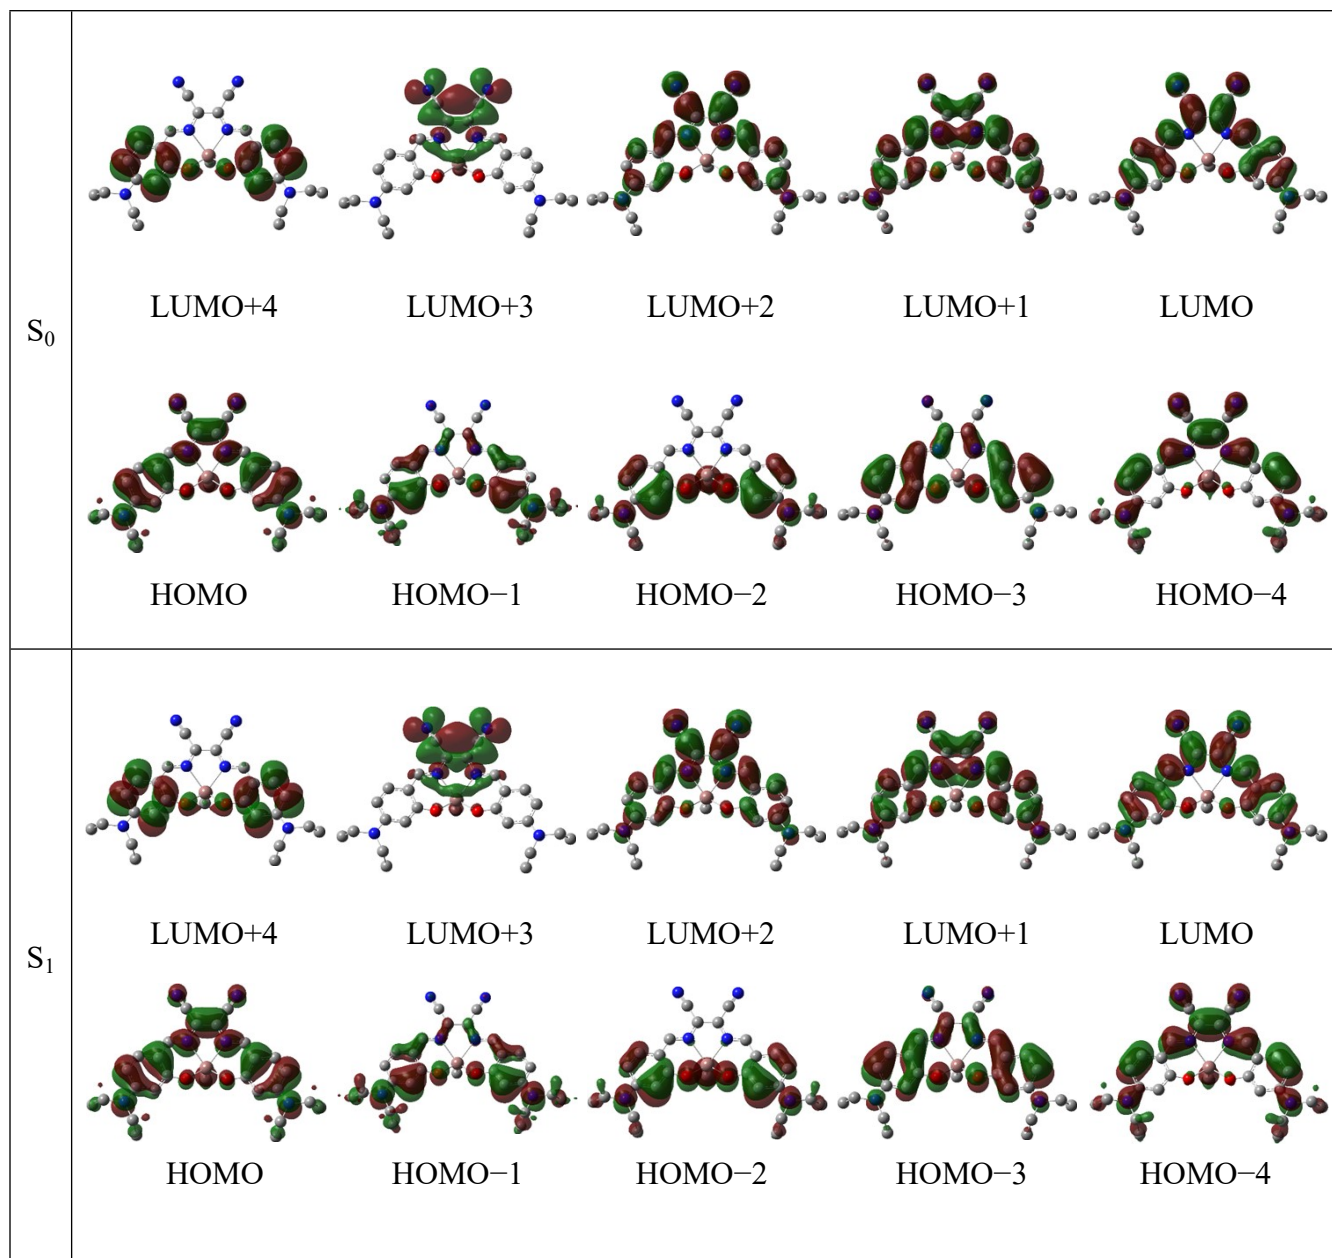

**Fig. S11** The selected frontier orbitals of **2** from TD-B3LYP calculations (Isovalue = 0.04 a.u.) at the ground state (S<sub>0</sub>) and first singlet excited state (S<sub>1</sub>) optimized geometries in toluene.

**Table S8** Computed absorption wavelengths ( $\lambda_{\text{calc}}$  in nm) and oscillator strengths ( $f_{\text{calc}}$ ) for **2** from TD-B3LYP calculations using the B3LYP geometries at the ground state ( $S_0$ ) and first singlet excited state ( $S_1$ ) optimized geometries in toluene

| state | $\lambda_{\text{calc}}$ (nm) | $f_{\text{calc}}$ | major contribution                |
|-------|------------------------------|-------------------|-----------------------------------|
| $S_0$ |                              |                   |                                   |
| 1     | 595.91                       | 0.9381            | HOMO $\rightarrow$ LUMO (98.5%)   |
| 2     | 467.38                       | 0.0816            | HOMO-2 $\rightarrow$ LUMO (97.9%) |
| 3     | 464.04                       | 0.0175            | HOMO-1 $\rightarrow$ LUMO (77.3%) |
| 4     | 431.80                       | 0.1194            | HOMO-3 $\rightarrow$ LUMO (66.5%) |
| 5     | 397.38                       | 0.9314            | HOMO $\rightarrow$ LUMO+1 (75.7%) |
| $S_1$ |                              |                   |                                   |
| 1     | 605.58                       | 0.9087            | HOMO $\rightarrow$ LUMO (98.4%)   |
| 2     | 494.92                       | 0.1055            | HOMO-2 $\rightarrow$ LUMO (97.8%) |
| 3     | 489.69                       | 0.0101            | HOMO-1 $\rightarrow$ LUMO (74.4%) |
| 4     | 450.55                       | 0.1552            | HOMO-3 $\rightarrow$ LUMO (64.4%) |
| 5     | 374.09                       | 0.1997            | HOMO $\rightarrow$ LUMO+1 (78.4%) |

**Table S9** Molecular orbital energies (in eV) and molecular orbital distributions (in %) of **2** at the ground state ( $S_0$ ) and first singlet excited state ( $S_1$ ) optimized geometries in toluene

|        | E (eV) | EtCN <sub>2</sub> imine | In-Me | Substituent | Phenoxy |
|--------|--------|-------------------------|-------|-------------|---------|
| $S_0$  |        |                         |       |             |         |
| LUMO+3 | -0.19  | 94.3                    | 3.5   | 0.0         | 2.2     |
| LUMO+2 | -0.83  | 60.9                    | 0.1   | 3.8         | 35.2    |
| LUMO+1 | -1.51  | 27.9                    | 1.3   | 6.6         | 64.2    |
| LUMO   | -2.63  | 45.2                    | 0.2   | 5.8         | 48.8    |
| HOMO   | -5.14  | 31.2                    | 2.4   | 20.2        | 46.1    |
| HOMO-1 | -5.72  | 4.3                     | 0.1   | 40.0        | 55.5    |
| HOMO-2 | -5.78  | 0.7                     | 5.8   | 16.7        | 76.7    |
| HOMO-3 | -5.91  | 10.2                    | 0.2   | 4.0         | 85.6    |
| $S_1$  |        |                         |       |             |         |
| LUMO+3 | -0.17  | 94.2                    | 3.5   | 0.0         | 2.3     |
| LUMO+2 | -0.89  | 59.7                    | 0.1   | 3.8         | 36.4    |
| LUMO+1 | -1.53  | 29.5                    | 1.3   | 6.3         | 62.9    |
| LUMO   | -2.79  | 45.9                    | 0.2   | 5.9         | 48.1    |
| HOMO   | -5.11  | 31.3                    | 2.7   | 19.4        | 46.5    |
| HOMO-1 | -5.75  | 3.7                     | 0.2   | 39.7        | 56.4    |
| HOMO-2 | -5.79  | 0.6                     | 6.5   | 17.8        | 75.1    |
| HOMO-3 | -5.91  | 10.3                    | 0.2   | 5.2         | 84.3    |

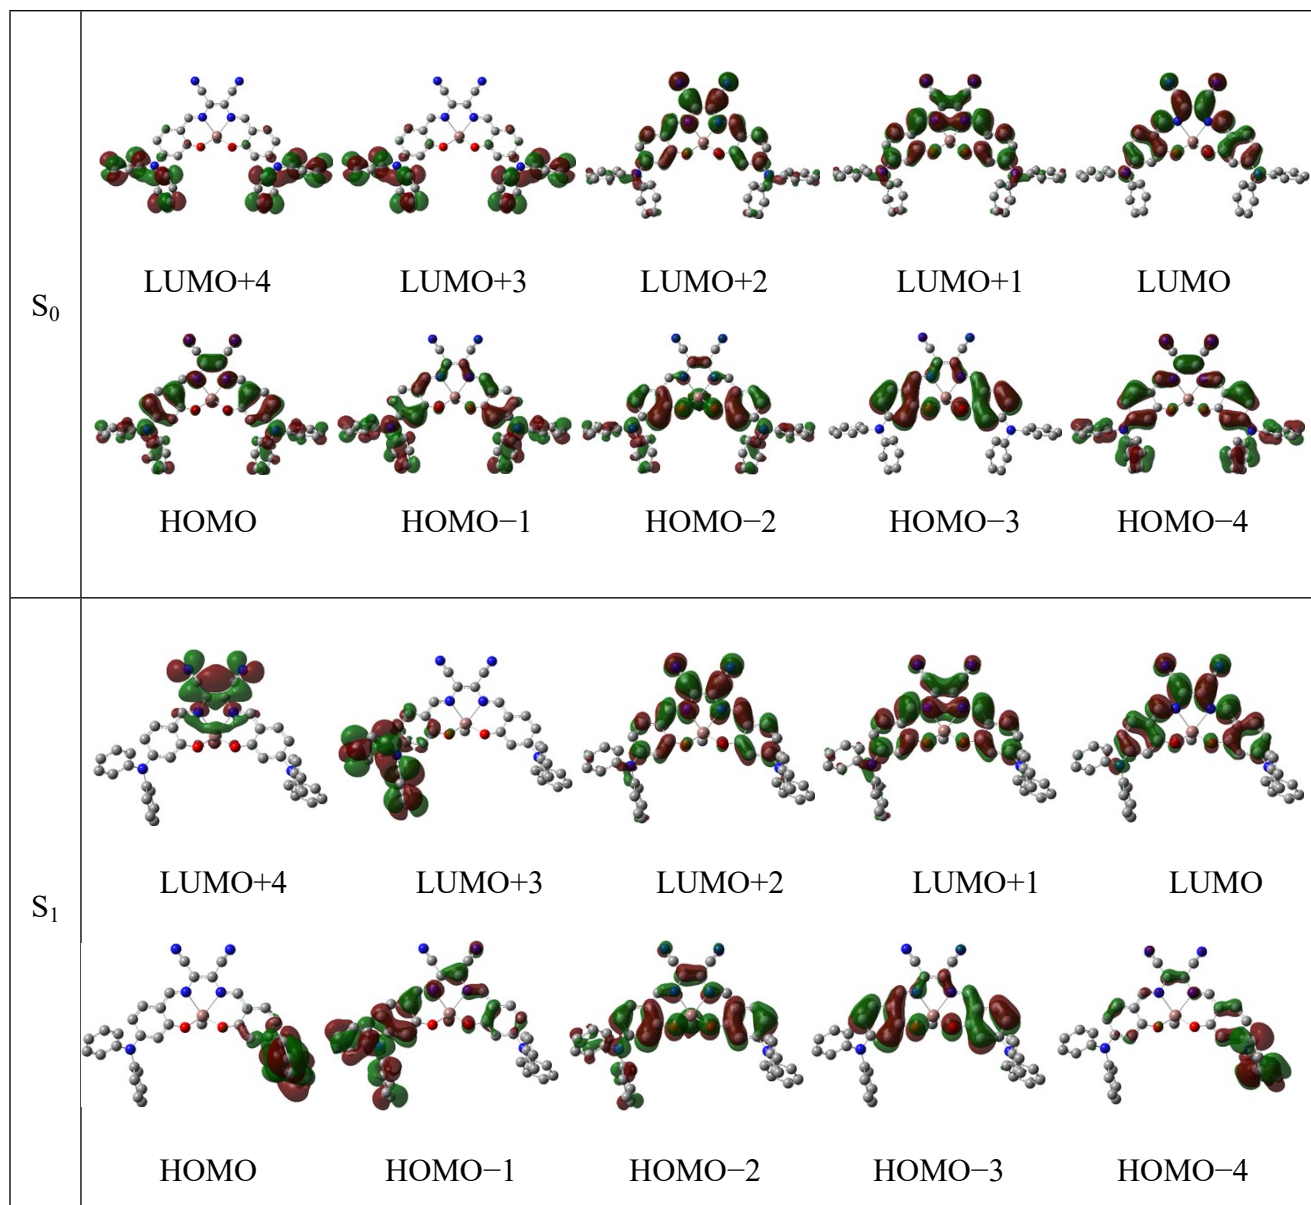

**Fig. S12** The selected frontier orbitals of **3** from TD-B3LYP calculations (Isovalue = 0.04 a.u.) at the ground state (S<sub>0</sub>) and first singlet excited state (S<sub>1</sub>) optimized geometries in toluene.



**Table S10** Computed absorption wavelengths ( $\lambda_{\text{calc}}$  in nm) and oscillator strengths ( $f_{\text{calc.}}$ ) for **3** from TD-B3LYP calculations using the B3LYP geometries at the ground state ( $S_0$ ) and first singlet excited state ( $S_1$ ) optimized geometries in toluene

| state | $\lambda_{\text{calc}}$ (nm) | $f_{\text{calc}}$ | major contribution |                  |
|-------|------------------------------|-------------------|--------------------|------------------|
| $S_0$ |                              |                   |                    |                  |
| 1     | 614.83                       | 1.0148            | HOMO               | → LUMO (98.9%)   |
| 2     | 514.71                       | 0.1905            | HOMO-1             | → LUMO (94.4%)   |
| 3     | 498.66                       | 0.0015            | HOMO-2             | → LUMO (98.1%)   |
| 4     | 456.02                       | 0.0731            | HOMO-3             | → LUMO (89.3%)   |
| 5     | 398.95                       | 0.8814            | HOMO               | → LUMO+1 (87.8%) |
| $S_1$ |                              |                   |                    |                  |
| 1     | 615.42                       | 0.6231            | HOMO               | → LUMO (99.1%)   |
| 2     | 585.43                       | 0.0944            | HOMO-1             | → LUMO (98.6%)   |
| 3     | 514.81                       | 0.1011            | HOMO-2             | → LUMO (96.9%)   |
| 4     | 493.35                       | 0.0346            | HOMO-3             | → LUMO (95.9%)   |
| 5     | 421.27                       | 0.4082            | HOMO               | → LUMO+1 (95.4%) |

**Table S11** Molecular orbital energies (in eV) and molecular orbital distributions (in %) of **3** at the ground state ( $S_0$ ) and first singlet excited state ( $S_1$ ) optimized geometries in toluene

|        | E (eV) | EtCN <sub>2</sub> imine | In-Me | Substituent | Phenoxy |
|--------|--------|-------------------------|-------|-------------|---------|
| $S_0$  |        |                         |       |             |         |
| LUMO+3 | -0.61  | 0.1                     | 0.1   | 93.9        | 5.9     |
| LUMO+2 | -1.08  | 58.0                    | 0.1   | 9.7         | 32.2    |
| LUMO+1 | -1.78  | 26.7                    | 1.1   | 9.6         | 62.6    |
| LUMO   | -2.84  | 42.7                    | 0.2   | 6.8         | 50.3    |
| HOMO   | -5.20  | 22.8                    | 1.5   | 40.1        | 35.7    |
| HOMO-1 | -5.55  | 4.4                     | 0.1   | 67.3        | 28.2    |
| HOMO-2 | -5.78  | 5.4                     | 6.3   | 23.4        | 64.9    |
| HOMO-3 | -6.01  | 6.2                     | 0.3   | 1.7         | 91.9    |
| $S_1$  |        |                         |       |             |         |
| LUMO+3 | -0.60  | 0.1                     | 0.2   | 91.9        | 7.8     |
| LUMO+2 | -1.40  | 58.9                    | 0.1   | 4.4         | 36.6    |
| LUMO+1 | -2.09  | 29.4                    | 1.2   | 5.3         | 64.1    |
| LUMO   | -3.34  | 45.2                    | 0.2   | 4.3         | 50.3    |
| HOMO   | -5.02  | 0.6                     | 0.0   | 95.4        | 4.0     |
| HOMO-1 | -5.44  | 11.1                    | 0.7   | 61.7        | 26.5    |
| HOMO-2 | -5.90  | 12.2                    | 7.1   | 13.2        | 67.5    |
| HOMO-3 | -6.18  | 4.8                     | 0.3   | 3.5         | 91.4    |

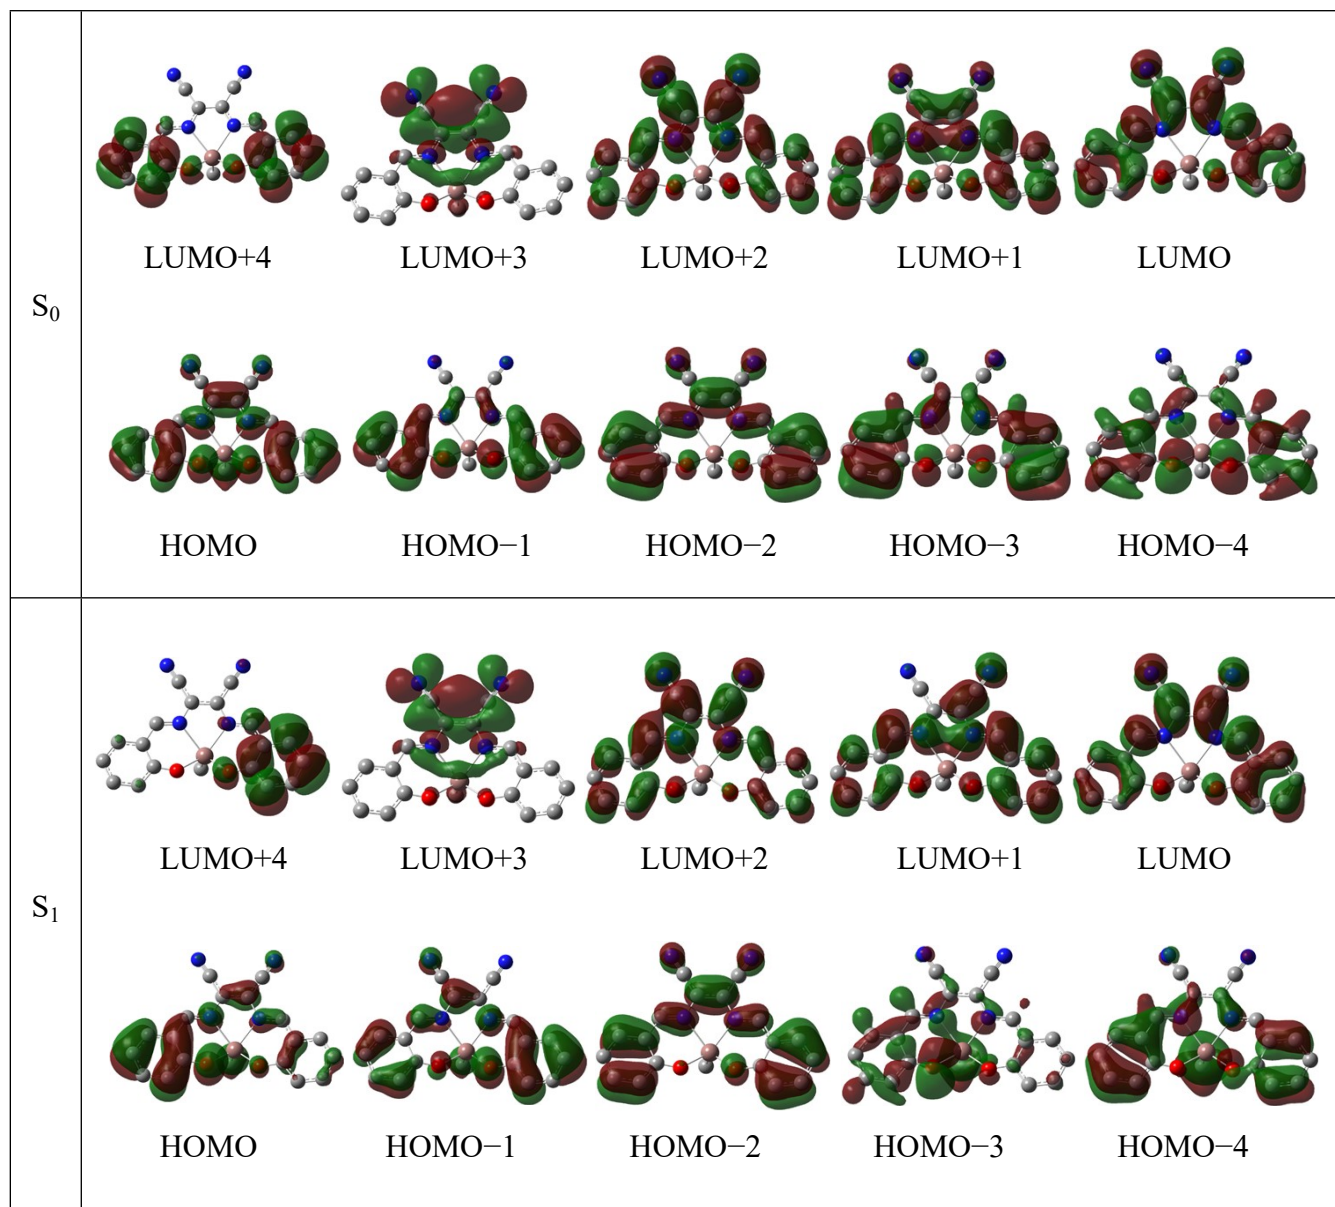

**Fig. S13** The selected frontier orbitals of **4** from TD-B3LYP calculations (Isovalue = 0.04 a.u.) at the ground state (S<sub>0</sub>) and first singlet excited state (S<sub>1</sub>) optimized geometries in toluene.

**Table S12** Computed absorption wavelengths ( $\lambda_{\text{calc}}$  in nm) and oscillator strengths ( $f_{\text{calc.}}$ ) for **4** from TD-

B3LYP calculations using the B3LYP geometries at the ground state ( $S_0$ ) and first singlet excited state ( $S_1$ ) optimized geometries in toluene

| state | $\lambda_{\text{calc}}$ (nm) | $f_{\text{calc}}$ | major contribution |                  |
|-------|------------------------------|-------------------|--------------------|------------------|
| $S_0$ |                              |                   |                    |                  |
| 1     | 570.52                       | 0.2956            | HOMO               | → LUMO (98.6%)   |
| 2     | 494.05                       | 0.0760            | HOMO-1             | → LUMO (98.0%)   |
| 3     | 397.93                       | 0.5009            | HOMO-2             | → LUMO (96.0%)   |
| 4     | 384.24                       | 0.1461            | HOMO               | → LUMO+1 (93.0%) |
| 5     | 356.95                       | 0.0066            | HOMO-4             | → LUMO (58.4%)   |
| $S_1$ |                              |                   |                    |                  |
| 1     | 670.58                       | 0.4577            | HOMO               | → LUMO (99.4%)   |
| 2     | 541.23                       | 0.1467            | HOMO-1             | → LUMO (97.3%)   |
| 3     | 423.30                       | 0.1412            | HOMO-2             | → LUMO (93.2%)   |
| 4     | 414.32                       | 0.0990            | HOMO               | → LUMO+1 (94.6%) |
| 5     | 394.11                       | 0.0248            | HOMO-3             | → LUMO (90.1%)   |

**Table S13** Molecular orbital energies (in eV) and molecular orbital distributions (in %) of **4** at the ground state ( $S_0$ ) and first singlet excited state ( $S_1$ ) optimized geometries in toluene

|        | E (eV) | EtCN <sub>2</sub> imine | In-Me | Phenoxy |
|--------|--------|-------------------------|-------|---------|
| $S_0$  |        |                         |       |         |
| LUMO+3 | -0.61  | 94.4                    | 3.4   | 2.2     |
| LUMO+2 | -1.36  | 63.3                    | 0.1   | 36.6    |
| LUMO+1 | -2.12  | 29.6                    | 1.3   | 69.2    |
| LUMO   | -3.24  | 44.3                    | 0.2   | 55.4    |
| HOMO   | -5.84  | 21.7                    | 6.6   | 71.7    |
| HOMO-1 | -6.19  | 5.0                     | 0.3   | 94.7    |
| HOMO-2 | -6.77  | 25.8                    | 0.1   | 74.1    |
| HOMO-3 | -7.47  | 17.9                    | 0.2   | 81.9    |
| $S_1$  |        |                         |       |         |
| LUMO+3 | -0.70  | 94.4                    | 3.4   | 2.3     |
| LUMO+2 | -1.43  | 57.7                    | 0.1   | 42.1    |
| LUMO+1 | -2.17  | 34.6                    | 1.2   | 64.2    |
| LUMO   | -3.47  | 47.0                    | 0.2   | 52.7    |
| HOMO   | -5.65  | 10.1                    | 4.8   | 85.1    |
| HOMO-1 | -6.18  | 13.1                    | 3.3   | 83.6    |
| HOMO-2 | -6.79  | 27.1                    | 0.1   | 72.8    |
| HOMO-3 | -7.34  | 8.0                     | 14.7  | 77.3    |

**Table S14** Cartesian coordinates of the ground state ( $S_0$ ) fully optimized geometry in toluene of **1** from B3LYP calculations (in Å)

| Atom | x         | y         | z         |   |           |           |           |   |           |           |           |
|------|-----------|-----------|-----------|---|-----------|-----------|-----------|---|-----------|-----------|-----------|
|      |           |           |           | C | -4.772009 | 0.611581  | -0.423158 | N | -2.075452 | 5.263927  | -0.674675 |
| In   | 0.000068  | 0.276966  | 0.790147  | H | -5.225306 | 1.593058  | -0.540630 | N | 5.769659  | -2.920768 | -0.386301 |
| N    | 1.339326  | 1.894931  | -0.104618 | C | -5.569448 | -0.498040 | -0.469802 | N | -5.769821 | -2.920744 | -0.385285 |
| N    | -1.339375 | 1.894917  | -0.104360 | C | -4.983634 | -1.802399 | -0.333782 | C | -5.166517 | -4.242355 | -0.264204 |
| O    | 1.474514  | -0.952378 | 0.096258  | C | -3.592473 | -1.894699 | -0.147201 | H | -5.945000 | -5.000685 | -0.341637 |
| O    | -1.474638 | -0.952377 | 0.096861  | C | -2.756689 | -0.766606 | -0.078614 | H | -4.432058 | -4.422075 | -1.058654 |
| C    | 2.756573  | -0.766609 | -0.079199 | C | 0.000425  | 0.524970  | 2.919772  | H | -4.661138 | -4.366533 | 0.701421  |
| C    | 3.592355  | -1.894705 | -0.147782 | H | 0.000175  | -0.445366 | 3.425984  | C | -7.213522 | -2.812281 | -0.566058 |
| C    | 4.983511  | -1.802411 | -0.334419 | H | 0.885471  | 1.076565  | 3.252409  | H | -7.470191 | -2.338616 | -1.521488 |
| C    | 5.569370  | -0.498043 | -0.470146 | H | -0.884174 | 1.077140  | 3.252638  | H | -7.647891 | -3.811479 | -0.559152 |
| C    | 4.771941  | 0.611582  | -0.423476 | H | 3.101520  | -2.852328 | -0.038591 | H | -7.680989 | -2.235763 | 0.241017  |
| H    | 5.225268  | 1.593072  | -0.540731 | H | -3.101625 | -2.852327 | -0.038109 | C | 7.213636  | -2.812189 | -0.564783 |
| C    | 3.359748  | 0.546375  | -0.230143 | H | 6.634592  | -0.384398 | -0.619201 | H | 7.647747  | -3.811510 | -0.559971 |
| C    | 2.646130  | 1.759243  | -0.277431 | H | -6.634629 | -0.384396 | -0.619140 | H | 7.471543  | -2.336235 | -1.518704 |
| H    | 3.232024  | 2.655313  | -0.501951 | C | 0.693245  | 3.103282  | -0.285400 | H | 7.680296  | -2.237762 | 0.244293  |
| C    | -2.646193 | 1.759224  | -0.277082 | C | -0.693329 | 3.103275  | -0.285277 | C | 5.166561  | -4.242324 | -0.263672 |
| H    | -3.232086 | 2.655286  | -0.501634 | C | 1.425611  | 4.312676  | -0.502017 | H | 4.430483  | -4.421986 | -1.056593 |
| C    | -3.359836 | 0.546376  | -0.229683 | C | -1.425741 | 4.312662  | -0.501756 | H | 5.944817  | -5.000711 | -0.342824 |
|      |           |           |           | N | 2.075289  | 5.263942  | -0.675050 | H | 4.663141  | -4.366484 | 0.703015  |

**Table S15** Cartesian coordinates of the first excited state ( $S_1$ ) fully optimized geometry in toluene of **1** from B3LYP calculations (in Å)

| Atom | x         | y         | z         |   |           |           |           |   |          |           |           |
|------|-----------|-----------|-----------|---|-----------|-----------|-----------|---|----------|-----------|-----------|
| In   | -0.000031 | 0.287675  | 0.684940  | H | -0.888228 | 1.060754  | 3.150982  | H | 5.931217 | -5.026433 | -0.243937 |
| N    | 1.351242  | 1.922927  | -0.148295 | H | 3.082214  | -2.858457 | -0.067441 | H | 4.608664 | -4.372595 | 0.738486  |
| N    | -1.351246 | 1.922949  | -0.148412 | H | -3.082113 | -2.858445 | -0.067548 |   |          |           |           |
| O    | 1.465665  | -0.942362 | -0.006064 | H | 6.646947  | -0.411065 | -0.510698 |   |          |           |           |
| O    | -1.465571 | -0.942339 | -0.006486 | H | -6.646917 | -0.411107 | -0.510545 |   |          |           |           |
| C    | 2.758684  | -0.771164 | -0.123087 | C | 0.714606  | 3.131795  | -0.263814 |   |          |           |           |
| C    | 3.585711  | -1.904909 | -0.153820 | C | -0.714585 | 3.131812  | -0.263886 |   |          |           |           |
| C    | 4.982915  | -1.822639 | -0.290252 | C | 1.446066  | 4.335912  | -0.421662 |   |          |           |           |
| C    | 5.576084  | -0.521805 | -0.402997 | C | -1.446022 | 4.335930  | -0.421798 |   |          |           |           |
| C    | 4.782542  | 0.600358  | -0.381107 | N | 2.098495  | 5.297950  | -0.547626 |   |          |           |           |
| H    | 5.249880  | 1.577313  | -0.475036 | N | -2.098457 | 5.297969  | -0.547724 |   |          |           |           |
| C    | 3.370409  | 0.543998  | -0.243409 | N | 5.768879  | -2.946698 | -0.315614 |   |          |           |           |
| C    | 2.663831  | 1.778278  | -0.282493 | N | -5.768904 | -2.946685 | -0.314820 |   |          |           |           |
| H    | 3.263539  | 2.672198  | -0.467364 | C | -5.155076 | -4.262875 | -0.206769 |   |          |           |           |
| C    | -2.663815 | 1.778297  | -0.282675 | H | -5.931363 | -5.026395 | -0.242696 |   |          |           |           |
| H    | -3.263533 | 2.672203  | -0.467589 | H | -4.452209 | -4.446329 | -1.029325 |   |          |           |           |
| C    | -3.370378 | 0.543999  | -0.243531 | H | -4.607352 | -4.372551 | 0.737657  |   |          |           |           |
| C    | -4.782512 | 0.600335  | -0.381135 | C | -7.216216 | -2.845975 | -0.461116 |   |          |           |           |
| H    | -5.249869 | 1.577271  | -0.475152 | H | -7.496897 | -2.366180 | -1.406827 |   |          |           |           |
| C    | -5.576055 | -0.521837 | -0.402834 | H | -7.644422 | -3.847705 | -0.452038 |   |          |           |           |
| C    | -4.982888 | -1.822654 | -0.289926 | H | -7.668289 | -2.277639 | 0.360844  |   |          |           |           |
| C    | -3.585647 | -1.904903 | -0.153780 | C | 7.216309  | -2.845978 | -0.460677 |   |          |           |           |
| C    | -2.758623 | -0.771158 | -0.123248 | H | 7.644347  | -3.847793 | -0.453010 |   |          |           |           |
| C    | -0.000245 | 0.511747  | 2.825338  | H | 7.497648  | -2.364732 | -1.405433 |   |          |           |           |
| H    | 0.000235  | -0.468683 | 3.309585  | H | 7.667982  | -2.279017 | 0.362474  |   |          |           |           |
| H    | 0.887163  | 1.061650  | 3.151036  | C | 5.155081  | -4.262822 | -0.206717 |   |          |           |           |
|      |           |           |           | H | 4.451030  | -4.446058 | -1.028284 |   |          |           |           |

**Table S16** Cartesian coordinates of the ground state ( $S_0$ ) fully optimized geometry in toluene of **2** from B3LYP calculations (in Å)

| Atom | x         | y         | z         |   |           |           |           |   |           |           |          |
|------|-----------|-----------|-----------|---|-----------|-----------|-----------|---|-----------|-----------|----------|
|      |           |           |           | H | 0.890128  | 1.272772  | 3.228349  | C | 4.941046  | -4.393015 | 0.762915 |
| In   | 0.000739  | 0.632848  | 0.720908  | H | -0.879487 | 1.27613   | 3.230641  | H | 4.468255  | -5.379231 | 0.707402 |
| N    | 1.339483  | 2.303067  | -0.071361 | H | 3.089373  | -2.435197 | -0.288064 | H | 5.882862  | -4.499643 | 1.30873  |
| N    | -1.33894  | 2.302846  | -0.069926 | H | -3.090611 | -2.435188 | -0.283676 | H | 4.286735  | -3.733934 | 1.339556 |
| O    | 1.473076  | -0.552615 | -0.0505   | H | 6.628995  | 0.05839   | -0.720688 | C | 7.989206  | -2.215599 | 0.462867 |
| O    | -1.474062 | -0.553032 | -0.044758 | H | -6.628834 | 0.05948   | -0.721558 | H | 7.836913  | -3.062303 | 1.138019 |
| C    | 2.754925  | -0.355986 | -0.216472 | C | 0.693563  | 3.520468  | -0.174133 | H | 9.062035  | -2.132835 | 0.258865 |
| C    | 3.589261  | -1.478787 | -0.35292  | C | -0.693193 | 3.520348  | -0.17344  | H | 7.670092  | -1.307758 | 0.982388 |
| C    | 4.980874  | -1.386433 | -0.546346 | C | 1.426034  | 4.741108  | -0.312808 | C | -7.991897 | -2.214416 | 0.459018 |
| C    | 5.563969  | -0.072234 | -0.590103 | C | -1.425929 | 4.740895  | -0.311459 | H | -9.064309 | -2.131243 | 0.252973 |
| C    | 4.769276  | 1.034054  | -0.473296 | N | 2.075682  | 5.701541  | -0.42469  | H | -7.841186 | -3.061311 | 1.13429  |
| H    | 5.227756  | 2.018804  | -0.524937 | N | -2.075702 | 5.701312  | -0.422767 | H | -7.673459 | -1.30679  | 0.979328 |
| C    | 3.357343  | 0.963247  | -0.285764 | N | 5.7633    | -2.503465 | -0.701314 | C | -4.943959 | -4.392181 | 0.764513 |
| C    | 2.646242  | 2.177585  | -0.253931 | N | -5.763884 | -2.502659 | -0.700998 | H | -5.886498 | -4.498419 | 1.309159 |
| H    | 3.233074  | 3.085455  | -0.421444 | C | -5.177555 | -3.846996 | -0.650656 | H | -4.471421 | -5.378562 | 0.709702 |
| C    | -2.645788 | 2.177449  | -0.252275 | H | -5.853475 | -4.513615 | -1.193519 | H | -4.290151 | -3.733249 | 1.341897 |
| H    | -3.232372 | 3.085378  | -0.420298 | H | -4.238647 | -3.841925 | -1.212887 |   |           |           |          |
| C    | -3.357307 | 0.963384  | -0.283621 | C | -7.220721 | -2.406115 | -0.853388 |   |           |           |          |
| C    | -4.769066 | 1.034589  | -0.472477 | H | -7.552045 | -3.327061 | -1.340897 |   |           |           |          |
| H    | -5.227179 | 2.019467  | -0.524945 | H | -7.455896 | -1.596992 | -1.551705 |   |           |           |          |
| C    | -5.563988 | -0.071469 | -0.589796 | C | 7.220457  | -2.407316 | -0.850968 |   |           |           |          |
| C    | -4.981359 | -1.385861 | -0.545108 | H | 7.552441  | -3.328437 | -1.33769  |   |           |           |          |
| C    | -3.590069 | -1.478629 | -0.349694 | H | 7.457151  | -1.598371 | -1.54898  |   |           |           |          |
| C    | -2.755509 | -0.356036 | -0.2128   | C | 5.176606  | -3.847676 | -0.651887 |   |           |           |          |
| C    | 0.003842  | 0.744916  | 2.862172  | H | 5.853109  | -4.514339 | -1.193964 |   |           |           |          |
| H    | 0.002491  | -0.255753 | 3.305446  | H | 4.238459  | -3.842324 | -1.21537  |   |           |           |          |

**Table S17** Cartesian coordinates of the first excited state ( $S_1$ ) fully optimized geometry in toluene of **2** from B3LYP calculations (in Å)

| Atom | x         | y         | z         |   |           |           |           |   |           |           |          |
|------|-----------|-----------|-----------|---|-----------|-----------|-----------|---|-----------|-----------|----------|
| In   | -0.000510 | 0.654170  | 0.624164  | H | 0.884148  | 1.287357  | 3.131276  | C | 4.880438  | -4.389883 | 0.810484 |
| N    | 1.350849  | 2.336700  | -0.112377 | H | -0.890596 | 1.285961  | 3.129761  | H | 4.401266  | -5.372976 | 0.754951 |
| N    | -1.351429 | 2.336885  | -0.113139 | H | 3.067093  | -2.436625 | -0.322802 | H | 5.805337  | -4.495304 | 1.384461 |
| O    | 1.463467  | -0.533847 | -0.139392 | H | -3.066201 | -2.436603 | -0.325862 | H | 4.214868  | -3.716731 | 1.356927 |
| O    | -1.462943 | -0.533353 | -0.143327 | H | 6.637018  | 0.027256  | -0.646434 | C | 7.971423  | -2.271672 | 0.533273 |
| C    | 2.755262  | -0.354911 | -0.259911 | H | -6.637215 | 0.026246  | -0.645201 | H | 7.806672  | -3.124514 | 1.197573 |
| C    | 3.579832  | -1.485616 | -0.367185 | C | 0.714486  | 3.550406  | -0.150381 | H | 9.046724  | -2.193803 | 0.341015 |
| C    | 4.976631  | -1.406297 | -0.522470 | C | -0.714975 | 3.550503  | -0.150692 | H | 7.651770  | -1.367060 | 1.058078 |
| C    | 5.567575  | -0.097578 | -0.547091 | C | 1.445986  | 4.762012  | -0.233186 | C | -7.969591 | -2.273006 | 0.535647 |
| C    | 4.777655  | 1.022516  | -0.446428 | C | -1.446320 | 4.762203  | -0.233634 | H | -9.045128 | -2.195356 | 0.344620 |
| H    | 5.249583  | 2.001275  | -0.478084 | N | 2.098397  | 5.730053  | -0.299099 | H | -7.803891 | -3.125867 | 1.199687 |
| C    | 3.366440  | 0.963921  | -0.303729 | N | -2.098658 | 5.730279  | -0.299713 | H | -7.649539 | -1.368374 | 1.060176 |
| C    | 2.662916  | 2.199459  | -0.259971 | N | 5.758092  | -2.531204 | -0.659510 | C | -4.877728 | -4.390677 | 0.808954 |
| H    | 3.263550  | 3.102439  | -0.389953 | N | -5.757552 | -2.531908 | -0.659642 | H | -5.801965 | -4.496509 | 1.383921 |
| C    | -2.663452 | 2.199571  | -0.260842 | C | -5.160520 | -3.870018 | -0.607716 | H | -4.398335 | -5.373619 | 0.752653 |
| H    | -3.264269 | 3.102486  | -0.390460 | H | -5.848334 | -4.550111 | -1.117552 | H | -4.211747 | -3.717466 | 1.354820 |
| C    | -3.366658 | 0.963836  | -0.304904 | H | -4.238629 | -3.866536 | -1.198124 |   |           |           |          |
| C    | -4.777990 | 1.022047  | -0.446464 | C | -7.216123 | -2.445829 | -0.790524 |   |           |           |          |
| H    | -5.250262 | 2.000669  | -0.477286 | H | -7.547412 | -3.364754 | -1.281970 |   |           |           |          |
| C    | -5.567641 | -0.098271 | -0.546862 | H | -7.466955 | -1.631176 | -1.476690 |   |           |           |          |
| C    | -4.976269 | -1.406801 | -0.523200 | C | 7.216498  | -2.444763 | -0.792031 |   |           |           |          |
| C    | -3.579278 | -1.485735 | -0.369352 | H | 7.547459  | -3.363638 | -1.283790 |   |           |           |          |
| C    | -2.754981 | -0.354817 | -0.262372 | H | 7.466351  | -1.630092 | -1.478527 |   |           |           |          |
| C    | -0.002504 | 0.756564  | 2.773123  | C | 5.161501  | -3.869473 | -0.606615 |   |           |           |          |
| H    | -0.002058 | -0.249233 | 3.202449  | H | 5.848943  | -4.549471 | -1.117076 |   |           |           |          |
|      |           |           |           | H | 4.238951  | -3.866387 | -1.195994 |   |           |           |          |

**Table S18** Cartesian coordinates of the ground state ( $S_0$ ) fully optimized geometry in toluene of **3** from B3LYP calculations (in Å)

| Atom | x         | y         | z         |   |           |           |           |   |           |           |           |
|------|-----------|-----------|-----------|---|-----------|-----------|-----------|---|-----------|-----------|-----------|
|      |           |           |           | H | 0.890284  | 2.844338  | 3.093368  | C | 5.457058  | -3.878663 | 0.592560  |
| In   | 0.000256  | 1.777476  | 0.738334  | H | -0.879497 | 2.859432  | 3.090149  | C | 4.507506  | -3.111562 | -1.500836 |
| N    | 1.340036  | 3.285736  | -0.337752 | H | 3.115920  | -1.434154 | 0.250222  | C | 4.957148  | -5.157162 | 0.345933  |
| N    | -1.340019 | 3.285762  | -0.337172 | H | -3.116077 | -1.434055 | 0.251211  | H | 6.020423  | -3.672670 | 1.496810  |
| O    | 1.474022  | 0.480260  | 0.177690  | H | 6.635429  | 0.941340  | -0.589826 | C | 3.999459  | -4.388833 | -1.732937 |
| O    | -1.474224 | 0.480395  | 0.179231  | H | -6.635438 | 0.941441  | -0.589473 | H | 4.342448  | -2.314633 | -2.218366 |
| C    | 2.753118  | 0.645999  | -0.023933 | C | 0.693104  | 4.465790  | -0.653557 | C | 4.224103  | -5.417093 | -0.813946 |
| C    | 3.591103  | -0.486062 | 0.032592  | C | -0.693168 | 4.465814  | -0.653260 | H | 5.134020  | -5.948485 | 1.068445  |
| C    | 4.974011  | -0.404900 | -0.151269 | C | 1.425587  | 5.643216  | -1.004963 | H | 3.436486  | -4.582315 | -2.641246 |
| C    | 5.569214  | 0.867670  | -0.419339 | C | -1.425775 | 5.643256  | -1.004320 | H | 3.831900  | -6.412080 | -1.001079 |
| C    | 4.774410  | 1.978361  | -0.498537 | N | 2.075309  | 6.568840  | -1.283559 | C | -5.234544 | -2.848921 | -0.330890 |
| H    | 5.227312  | 2.938915  | -0.731796 | N | -2.075602 | 6.568932  | -1.282502 | C | -4.506961 | -3.111312 | -1.500260 |
| C    | 3.360895  | 1.932318  | -0.308637 | N | 5.777280  | -1.544552 | -0.093659 | C | -5.457611 | -3.878778 | 0.592496  |
| C    | 2.646058  | 3.134294  | -0.492337 | N | -5.777334 | -1.544510 | -0.093361 | C | -3.998899 | -4.388570 | -1.732375 |
| H    | 3.232004  | 3.999720  | -0.814948 | C | 7.159817  | -1.458925 | 0.264988  | H | -4.341483 | -2.314250 | -2.217545 |
| C    | -2.646076 | 3.134353  | -0.491474 | C | 8.123811  | -2.117207 | -0.511535 | C | -4.957681 | -5.157263 | 0.345846  |
| H    | -3.232050 | 3.999783  | -0.814022 | C | 7.558540  | -0.745327 | 1.404495  | H | -6.021405 | -3.672944 | 1.496514  |
| C    | -3.360958 | 1.932416  | -0.307672 | C | 9.469286  | -2.057740 | -0.151582 | C | -4.224077 | -5.417013 | -0.813719 |
| C    | -4.774442 | 1.978463  | -0.497777 | H | 7.812715  | -2.670774 | -1.391482 | H | -3.435491 | -4.581895 | -2.640449 |
| H    | -5.227305 | 2.939023  | -0.731090 | C | 8.908530  | -0.678277 | 1.748662  | H | -5.134977 | -5.948723 | 1.068105  |
| C    | -5.569260 | 0.867763  | -0.418772 | H | 6.810187  | -0.250088 | 2.014564  | H | -3.831859 | -6.411992 | -1.000864 |
| C    | -4.974080 | -0.404805 | -0.150678 | C | 9.868621  | -1.335244 | 0.975732  | C | -7.160003 | -1.458910 | 0.264822  |
| C    | -3.591224 | -0.485965 | 0.033499  | H | 10.208264 | -2.569965 | -0.760725 | C | -8.123743 | -2.116976 | -0.512189 |
| C    | -2.753229 | 0.646116  | -0.022805 | H | 9.206914  | -0.122372 | 2.632679  | C | -7.559086 | -0.745542 | 1.404348  |
| C    | 0.000887  | 2.266110  | 2.823981  | H | 10.917847 | -1.287244 | 1.250668  | C | -9.469346 | -2.057533 | -0.152692 |
| H    | -0.007951 | 1.358683  | 3.435507  | C | 5.234522  | -2.849001 | -0.331161 | H | -7.812357 | -2.670360 | -1.392147 |



|   |            |           |           |
|---|------------|-----------|-----------|
| C | -8.909190  | -0.678513 | 1.748061  |
| H | -6.810910  | -0.250464 | 2.014766  |
| C | -9.869036  | -1.335274 | 0.974644  |
| H | -10.208137 | -2.569586 | -0.762206 |
| H | -9.207873  | -0.122796 | 2.632094  |
| H | -10.918356 | -1.287288 | 1.249227  |

---

**Table S19** Cartesian coordinates of the first excited state ( $S_1$ ) fully optimized geometry in toluene of **3** from B3LYP calculations (in Å)

| Atom | x         | y         | z         |   |           |           |           |   |           |           |           |
|------|-----------|-----------|-----------|---|-----------|-----------|-----------|---|-----------|-----------|-----------|
| In   | -0.018883 | 1.703653  | 0.795386  | H | 0.563858  | 2.644938  | 3.297203  | C | 4.925331  | -2.584635 | 2.161581  |
| N    | 1.365995  | 3.293528  | -0.021208 | H | -1.175546 | 2.343307  | 3.195674  | C | 5.429233  | -4.062625 | 0.312055  |
| N    | -1.346564 | 3.337468  | -0.131100 | H | 3.071151  | -1.513442 | 0.201654  | C | 4.555635  | -3.684719 | 2.933224  |
| O    | 1.440426  | 0.420549  | 0.201421  | H | -3.124319 | -1.450384 | -0.123068 | H | 4.875667  | -1.583059 | 2.575362  |
| O    | -1.467087 | 0.475012  | 0.019159  | H | 6.649015  | 0.872760  | -0.186004 | C | 5.074062  | -5.158943 | 1.097151  |
| C    | 2.740645  | 0.592256  | 0.110313  | H | -6.650687 | 0.981263  | -0.658715 | H | 5.761150  | -4.206059 | -0.710946 |
| C    | 3.565062  | -0.552960 | 0.114701  | C | 0.743990  | 4.512892  | -0.196470 | C | 4.631590  | -4.977986 | 2.409392  |
| C    | 4.954813  | -0.474823 | 0.011716  | C | -0.676036 | 4.534859  | -0.247052 | H | 4.219743  | -3.529197 | 3.954600  |
| C    | 5.570648  | 0.795359  | -0.118783 | C | 1.499807  | 5.697528  | -0.371630 | H | 5.132279  | -6.157959 | 0.674121  |
| C    | 4.783380  | 1.924815  | -0.147564 | C | -1.387783 | 5.740651  | -0.469646 | H | 4.349881  | -5.833101 | 3.016452  |
| H    | 5.258549  | 2.897807  | -0.248168 | N | 2.172925  | 6.644392  | -0.509298 | C | -5.888797 | -2.262368 | -1.607720 |
| C    | 3.368692  | 1.882312  | -0.033369 | N | -2.038062 | 6.695737  | -0.647877 | C | -5.601868 | -1.621483 | -2.843901 |
| C    | 2.671085  | 3.123933  | -0.129444 | N | 5.749437  | -1.644163 | 0.047340  | C | -6.230280 | -3.644366 | -1.607023 |
| H    | 3.286053  | 4.003427  | -0.337320 | N | -5.776519 | -1.555108 | -0.422722 | C | -5.712048 | -2.328354 | -4.027660 |
| C    | -2.642893 | 3.208490  | -0.303617 | C | 6.933691  | -1.732521 | -0.738723 | H | -5.321989 | -0.576868 | -2.850087 |
| H    | -3.233923 | 4.101549  | -0.520520 | C | 6.941323  | -1.292272 | -2.072023 | C | -6.321930 | -4.334521 | -2.803049 |
| C    | -3.369956 | 1.958843  | -0.279205 | C | 8.109243  | -2.270405 | -0.190517 | H | -6.364663 | -4.164173 | -0.667301 |
| C    | -4.766744 | 2.027790  | -0.467873 | C | 8.106335  | -1.378246 | -2.833140 | C | -6.075569 | -3.683687 | -4.019971 |
| H    | -5.222491 | 3.008800  | -0.574304 | H | 6.033342  | -0.884358 | -2.503524 | H | -5.510814 | -1.826615 | -4.967664 |
| C    | -5.577885 | 0.900611  | -0.524601 | C | 9.264344  | -2.368903 | -0.964535 | H | -6.561146 | -5.392265 | -2.791253 |
| C    | -4.958886 | -0.344690 | -0.392187 | H | 8.110076  | -2.607664 | 0.840804  | H | -6.145299 | -4.232332 | -4.952809 |
| C    | -3.590351 | -0.474876 | -0.210725 | C | 9.272721  | -1.919834 | -2.287528 | C | -6.438018 | -1.935719 | 0.764340  |
| C    | -2.749394 | 0.667850  | -0.140034 | H | 8.095931  | -1.032082 | -3.862845 | C | -7.740253 | -2.480014 | 0.711775  |
| C    | -0.192026 | 1.947763  | 2.921788  | H | 10.165905 | -2.786428 | -0.525038 | C | -5.824337 | -1.708845 | 2.013581  |
| H    | -0.055150 | 0.994097  | 3.441500  | H | 10.176267 | -1.991327 | -2.885416 | C | -8.394622 | -2.821583 | 1.889195  |
|      |           |           |           | C | 5.362159  | -2.763476 | 0.839135  | H | -8.243326 | -2.583877 | -0.242400 |

|   |           |           |          |
|---|-----------|-----------|----------|
| C | -6.487714 | -2.067109 | 3.178509 |
| H | -4.832668 | -1.276255 | 2.053303 |
| C | -7.771105 | -2.626276 | 3.124854 |
| H | -9.401847 | -3.221925 | 1.842563 |
| H | -6.002634 | -1.910407 | 4.135981 |
| H | -8.286063 | -2.892919 | 4.041741 |

---

**Table S20** Cartesian coordinates of the ground state ( $S_0$ ) fully optimized geometry in toluene of **4** from B3LYP calculations (in Å)

| <b>Atom</b> | <b>x</b>  | <b>y</b>  | <b>z</b>  |   |           |           |           |
|-------------|-----------|-----------|-----------|---|-----------|-----------|-----------|
| In          | -0.000027 | -0.551261 | 0.682851  | H | 3.129437  | -3.585995 | -0.516270 |
| N           | 1.340724  | 1.153635  | -0.072432 | H | -3.129166 | -3.585983 | -0.516945 |
| N           | -1.340766 | 1.153662  | -0.072412 | H | 6.631198  | -1.083203 | -0.877220 |
| O           | 1.473589  | -1.690803 | -0.146917 | H | -6.631174 | -1.083397 | -0.876925 |
| O           | -1.473407 | -1.690737 | -0.147459 | C | 0.691348  | 2.376664  | -0.125918 |
| C           | 2.747151  | -1.483556 | -0.327017 | C | -0.691396 | 2.376674  | -0.125891 |
| C           | 3.595749  | -2.606518 | -0.527338 | C | 1.425018  | 3.602120  | -0.217568 |
| C           | 5.561447  | -1.181377 | -0.728136 | C | -1.425053 | 3.602155  | -0.217484 |
| C           | 4.770060  | -0.069980 | -0.561220 | N | 2.074181  | 4.565609  | -0.291288 |
| H           | 5.211318  | 0.923362  | -0.584524 | N | -2.074195 | 4.565659  | -0.291187 |
| C           | 3.361810  | -0.174481 | -0.358379 | C | -4.954907 | -2.459404 | -0.713755 |
| C           | 2.638123  | 1.043811  | -0.277767 | H | -5.570976 | -3.343936 | -0.851964 |
| H           | 3.218564  | 1.958113  | -0.430924 | C | 4.955064  | -2.459311 | -0.713555 |
| C           | -2.638174 | 1.043813  | -0.277668 | H | 5.571186  | -3.343819 | -0.851687 |
| H           | -3.218665 | 1.958107  | -0.430690 |   |           |           |           |
| C           | -3.361786 | -0.174515 | -0.358365 |   |           |           |           |
| C           | -4.770071 | -0.070087 | -0.561003 |   |           |           |           |
| H           | -5.211406 | 0.923226  | -0.584070 |   |           |           |           |
| C           | -5.561394 | -1.181515 | -0.728011 |   |           |           |           |
| C           | -3.595554 | -2.606538 | -0.527759 |   |           |           |           |
| C           | -2.747015 | -1.483553 | -0.327327 |   |           |           |           |
| C           | -0.000270 | -0.482233 | 2.819915  |   |           |           |           |
| H           | -0.000143 | -1.492840 | 3.238919  |   |           |           |           |
| H           | 0.884824  | 0.038905  | 3.197263  |   |           |           |           |
| H           | -0.885624 | 0.038606  | 3.197069  |   |           |           |           |

**Table S21** Cartesian coordinates of the first excited state ( $S_1$ ) fully optimized geometry in toluene of **4** from B3LYP calculations (in Å)

| <b>Atom</b> | <b>x</b>  | <b>y</b>  | <b>z</b>  |   |           |           |           |
|-------------|-----------|-----------|-----------|---|-----------|-----------|-----------|
| In          | -0.000027 | -0.551261 | 0.682851  | H | 3.129437  | -3.585995 | -0.516270 |
| N           | 1.340724  | 1.153635  | -0.072432 | H | -3.129166 | -3.585983 | -0.516945 |
| N           | -1.340766 | 1.153662  | -0.072412 | H | 6.631198  | -1.083203 | -0.877220 |
| O           | 1.473589  | -1.690803 | -0.146917 | H | -6.631174 | -1.083397 | -0.876925 |
| O           | -1.473407 | -1.690737 | -0.147459 | C | 0.691348  | 2.376664  | -0.125918 |
| C           | 2.747151  | -1.483556 | -0.327017 | C | -0.691396 | 2.376674  | -0.125891 |
| C           | 3.595749  | -2.606518 | -0.527338 | C | 1.425018  | 3.602120  | -0.217568 |
| C           | 5.561447  | -1.181377 | -0.728136 | C | -1.425053 | 3.602155  | -0.217484 |
| C           | 4.770060  | -0.069980 | -0.561220 | N | 2.074181  | 4.565609  | -0.291288 |
| H           | 5.211318  | 0.923362  | -0.584524 | N | -2.074195 | 4.565659  | -0.291187 |
| C           | 3.361810  | -0.174481 | -0.358379 | C | -4.954907 | -2.459404 | -0.713755 |
| C           | 2.638123  | 1.043811  | -0.277767 | H | -5.570976 | -3.343936 | -0.851964 |
| H           | 3.218564  | 1.958113  | -0.430924 | C | 4.955064  | -2.459311 | -0.713555 |
| C           | -2.638174 | 1.043813  | -0.277668 | H | 5.571186  | -3.343819 | -0.851687 |
| H           | -3.218665 | 1.958107  | -0.430690 |   |           |           |           |
| C           | -3.361786 | -0.174515 | -0.358365 |   |           |           |           |
| C           | -4.770071 | -0.070087 | -0.561003 |   |           |           |           |
| H           | -5.211406 | 0.923226  | -0.584070 |   |           |           |           |
| C           | -5.561394 | -1.181515 | -0.728011 |   |           |           |           |
| C           | -3.595554 | -2.606538 | -0.527759 |   |           |           |           |
| C           | -2.747015 | -1.483553 | -0.327327 |   |           |           |           |
| C           | -0.000270 | -0.482233 | 2.819915  |   |           |           |           |
| H           | -0.000143 | -1.492840 | 3.238919  |   |           |           |           |
| H           | 0.884824  | 0.038905  | 3.197263  |   |           |           |           |
| H           | -0.885624 | 0.038606  | 3.197069  |   |           |           |           |
